# Supplementary material for: Microbes and Mental Illness: Past, Present, and Future
Source: MDPI journal article supplement (doi:10.3390/healthcare12010083), 2023-12-29
Supplement: s1 [file s1]

## Supplementary S1

### Peer-Reviewed Evidence of Lyme Borreliosis/Tick-Borne Disease Associated with Psychiatric Symptoms

The following is a list of peer-reviewed articles that support the evidence of Lyme and other tick-borne diseases associated with neuropsychiatric illness. It is organized into two different categories— neuropsychiatric symptoms and dementia.

#### Lyme/Tick-Borne Diseases and Neuropsychiatric Symptoms

1. Aalto A, Sjowall J, Davidsson L, Forsberg P, Smedby O. Brain magnetic resonance imaging does not contribute to the diagnosis of chronic neuroborreliosis. *Acta Radiol* 2007; 48: 755-762. [white matter hyperintensities or basal ganglia lesions].
2. Ackermann R. Anmerkungen zu der Arbeit von K.-J. Neumärker et al. Borrelien- Enzephalitis und Katatonie im Jugendalter. *Nervenarzt* (1989) 60: 115-119 [Comments on the contribution by K.-J. Neumärker et al. *Borrelia encephalitis and catatonia in adolescents. Nervenarzt* (1989) 60:115-119]. *Nervenarzt*. 1989 Dec;60(12):765. German. PMID: 2608154.
3. Ackermann R, Rehse-Kupper B, Gollmer E, Schmidt R. Chronic neurologic manifestations of erythema migrans borreliosis. *Ann N Y Acad Sci*. 1988;539:16- 23.
4. Adams WV, Rose CD, Eppes SC, Klein JD. Long-term cognitive effects of Lyme disease in children. *Appl Neuropsychol* 1999;6(1):39-45
5. Alaedini A, Latov N. Antibodies against OspA epitopes of *Borrelia burgdorferi* cross- react with neural tissue. *J Neuroimmunol*. 2005 Feb;159(1-2):192-5. Epub 2004 Nov 26.
6. Almeida OP, Lautenschlager NT. Dementia associated with infectious diseases. *Int Psychogeriatr*. 2005;17 Suppl 1:S65- 77. Review.
7. American Psychiatric Association Work Group on Psychiatric Evaluation. The American Psychiatric Association Practice Guidelines for the Psychiatric Evaluation of Adults. Third Edition. 2016 Medical History. Section. doi:10.1176/appi.books.9780890426760.
8. Amsterdam JD, O'Reardon JP. Treatment-Resistant Depression: Progress and Limitations. *Psychiatric Annals*. 1998;28(11):633
9. Asadipooya K, Dehghanian A, Omrani GH, Abbasi F. Short-course treatment in neurobrucellosis: a study in Iran. *Neurol India*. 2011 Jan- Feb;59(1):101-3.
10. Asch ES, Bujak DI, Weiss M, Peterson MG, Weinstein A. Lyme disease: an infectious and postinfectious syndrome. *J Rheumatol*. 1994 Mar;21(3):454-61
11. Asha'ari ZA, Mat Zain N, Razali A. Phonophobia and hyperacusis: practical points from a case report. *Malays J Med Sci*. 2010;17(1):49–51.
12. Askenazy F, Dor E, Benoit M, Dupuis G, Serret S, Myquel M, Seddiki Y. Catatonia in a 14-year-old girl: treatment with clonazepam and carbamazepine, a 10-year follow-up. *Encephale*. 2010 Feb;36(1):46-53.
13. Attree EA, Dancey CP, Keeling D, Wilson C. Cognitive Function in People With Chronic Illness: Inflammatory Bowel Disease and Irritable Bowel Syndrome, *Applied Neuropsychology*. 2003. 10:2, 96-104, DOI: 10.1207/S15324826AN1002\_05
14. Aucott, J.N., Rebman, A.W., Crowder, L.A. et al. Post-treatment Lyme disease syndrome symptomatology and the impact on life functioning: is there something here? *Qual Life Res* (2013) 22: 75. <https://doi.org/10.1007/s11136-012-0126-6>
15. Azzolino S, Zaman R, Hankir A, Carrick FR. The prevalence of Lyme disease and associated co-infections in people with a chronic post-concussive syndrome. *Psychiatr Danub*. 2019 Sep;31(Suppl 3):299-307.
16. Balakrishnan N, Ericson M, Maggi R, Breitschwerdt EB. 2016. Vasculitis, Cerebral infarction and

Persistent *Bartonella henselae* infection in a Child. *Parasit Vectors*. 2016;9:e254

17. Banerjee R, Liu JJ, Minhas HM. Lyme neuroborreliosis presenting with alexithymia and suicide attempts. *J Clin Psychiatry*. 2013 Oct;74(10):981.
18. Bar KJ, Jochum T, Hager F, Meissner W, Sauer H. Painful hallucinations and somatic delusions in a patient with the possible diagnosis of neuroborreliosis. *Clin J Pain*. 20 Jul-Aug;21(4):362-3.
19. Barr WB, Rastogi R, Ravdin L, Hilton E. Relations Among Indexes of Memory Disturbance and Depression in Patients With Lyme Borreliosis, *Applied Neuropsychology*, 1999 6:1, 12-18, DOI: 10.1207/s15324826an0601\_2
20. Barnett W, Sigmund D, Roelcke U, Mundt C. Endogenous paranoid-hallucinatory syndrome caused by *Borrelia encephalitis* *Nervenarzt* 1991 Jul;62(7):445-7 [German]
21. Battaglia H, Alvarez G, Mercu A, Fay M, Campodonico M. Psychiatric symptomatology associated with presumptive Lyme disease: Clinical evidence. *J Spiro Tick-Borne Dis* 2000; 7: 22-25.
22. Bechter K. Diagnosis of infectious or inflammatory psychosyndromes. *Open Neurol J*. 2012; 6:113-118.
23. Belman AL, Iyer M, Coyle PK, Dattwyler R. Neurologic manifestations in children with North American Lyme disease. *Neurology*. 1993 Dec;43(12):2609-14. doi: 10.1212/wnl.43.12.2609.
24. Binalsheikh IM, Griesemer D, Wang S, Alvarez-Altalef R. Lyme neuroborreliosis presenting as Alice in Wonderland syndrome. *Pediatr Neurol*. 2012; 46:185-186.
25. Belman AL, Iyer M, Coyle PK, Dattwyler R. Neurologic manifestations in children with North American Lyme disease. *Neurology*. 1993 Dec;43(12):2609-14.
26. Benke T, Gasse T, Hittmair-Delazer M, Schmutzhard E. Lyme encephalopathy: long- term neuropsychological deficits years after acute neuroborreliosis. *Acta Neurol Scand*. 1995 May;91(5):353-7.
27. Berman DS, Wenglin BD. Complaints attributed to chronic Lyme disease: depression or fibromyalgia? *Am J Med*. 1995 Oct;99(4):440.
28. Bertholon P, Cazorla C, Carricajo A, Oletski A, Laurent B. Bilateral sensorineural hearing loss and cerebellar ataxia in the case of late stage Lyme disease. *Braz J Otorhinolaryngol*. 2012 Dec;78(6):124.
29. Bertrand E, Szpak GM, Pilkowski E, Habib N, Lipczynska-Lojkowska W, Rudnicka A, Tylewska-Wierzbanska S, Kulczycki J. Central nervous system infection caused by *Borrelia burgdorferi*. Clinico-pathological correlation of three post- mortem cases. *Folia Neuropathol* 1999;37:43-51.
30. Biesiada G, Czapiel J, Sobczyk-Krupiarz I, Garlicki A, Mach T. Neuroborreliosis with extrapyramidal symptoms: a case report. *Pol Arch Med Wewn*. 2008 May;118(5):314-7.
31. Binalsheikh IM, Griesemer D, Wang S, Alvarez-Altalef R. Lyme neuroborreliosis presenting as Alice in Wonderland syndrome. *Pediatr Neurol*. 2012 Mar;46(3):185-6. doi: 10.1016/j.pediatrneurol.2012.01.001.
32. Biniaz-Harris, N.; Kuvaldina, M.; Fallon, B.A. Neuropsychiatric Lyme Disease and Vagus Nerve Stimulation. *Antibiotics* **2023**, *12*, 1347. <https://doi.org/10.3390/antibiotics12091347>
33. Bitam I, Raoult D. Other Tick-Borne Diseases in Europe. *Curr Probl Dermatol*. 2009;37:130-154. Epub 2009 Apr 8
34. Blanc F; GEELY. Neurologic and psychiatric manifestations of Lyme disease. *Med Mal Infect*. 2007 Jul-Aug;37(7- 8):435-45. Epub 2007 Mar 9. Review.
35. Blomström Å, Kosidou K, Kristiansson M, Masterman T. Infection during childhood and the risk of violent criminal behavior in adulthood. *Brain Behav Immun*. 2020 May;86:63-71. doi: 10.1016/j.bbi.2019.02.026. Epub 2019 Feb 23. PMID: 30807840.
36. Bloom BJ, Wyckoff PM, Meissner HC, Steere AC. Neurocognitive abnormalities in children after classic manifestations of Lyme disease. *Pediatr Infect Dis J* 1998; 17(3):189-96.
37. Blum K, Modestino EJ, Febo M, Steinberg B, McLaughlin T, Fried L, Baron D, Siwicki D, Badgaiyan

- RD. Lyme and Dopaminergic Function: Hypothesizing Reduced Reward Deficiency Symptomatology by Regulating Dopamine Transmission. *J Syst Integr Neurosci*. 2017 May;3(3):10.15761/JSIN.1000163. doi: 10.15761/JSIN.1000163.
38. Bolivar P, Griffin H. Bolivar P, Griffin H. California Residents with Chronic Lyme Disease. August 2018 DOI: 10.13140/RG.2.2.11651.55840
39. Blum K, Modestino EJ, Febo M, Steinberg B, McLaughlin T, Fried L, Baron D, Siwicki D, Badgaiyan RD. Lyme and Dopaminergic Function: Hypothesizing Reduced Reward Deficiency Symptomatology by Regulating Dopamine Transmission. *J Syst Integr Neurosci*. 2017 May;3(3).
40. Borgermans L, Goderis G, Vandevoorde J, Devroey D. Relevance of chronic Lyme disease to family medicine as a complex multidimensional chronic disease construct: A systematic review. *Int J Family Med*.2014;2014:138016.
41. Bradley JM, Mascarelli PE, Trull CL, Maggi RG, Breitschwerdt EB. 2014. *Bartonella henselae* infections in an owner and two Papillion Dogs exposed to Tropical Rat Mites (*Ornithonyssus bacoti*). *Vector Borne Zoonotic Dis* 14:703-709.
42. Bransfield RC. Adverse Childhood Events, Post-Traumatic Stress Disorder, Infectious Encephalopathies and Immune-Mediated Disease. *Healthcare*. 2022; 10(6):1127. <https://doi.org/10.3390/healthcare10061127>
43. Bransfield RC, Aidlen DM, Cook MJ, Javia S. A Clinical Diagnostic System for Late-Stage Neuropsychiatric Lyme Borreliosis Based upon an Analysis of 100 Patients. *Healthcare (Basel)*. 2020 Jan 6;8(1):13. doi: 10.3390/healthcare8010013.
44. Bransfield RC. Aggressiveness, violence, homicidality, homicide, and Lyme disease. *Neuropsychiatr Dis Treat*. 2018; 14: 693–713. doi: 10.2147/NDT.S155143
45. Bransfield R, Brand S, Sherr V. Treatment of patients with persistent symptoms and a history of Lyme disease. *N Engl J Med*. 2001 Nov 8;345(19):1424-5.
46. Bransfield, R. C., Cook, M. J., & Bransfield, D. R. (2019). Proposed Lyme Disease Guidelines and Psychiatric Illnesses. *Healthcare (Basel, Switzerland)*, 7(3), 105. <https://doi.org/10.3390/healthcare7030105>
47. Bransfield RC, Embers ME, Dwork AJ. A Fatal Case of Late Stage Lyme Borreliosis and Substance Abuse. *J Affect Disord*. 2023, 12, 100525, ISSN 2666-9153. <https://doi.org/10.1016/j.jadr.2023.100525>.
48. Bransfield, RC, Friedman, KJ. (2019). Differentiating Psychosomatic, Somatopsychic, Multisystem Illnesses, and Medical Uncertainty. *Healthcare (Basel, Switzerland)*, 7(4), 114. <https://doi.org/10.3390/healthcare7040114>
49. Bransfield RC. Suicide and Lyme and associated diseases. *Neuropsychiatr Dis Treat*. 2017; 13: 1575–1587. doi: 10.2147/NDT.S136137
50. Bransfield RC. The psychoimmunology of Lyme/tick-borne diseases and its association with neuropsychiatric symptoms. *Open Neurol J*. 2012; 6:88-93.
51. Bransfield RC, Wulfman JS, Harvey WT, Usman AI. The association between tick-borne infections, Lyme borreliosis and autism spectrum disorders. *Med Hypotheses*. 2008;70(5):967-74.
52. Bransfield RC. Case report: Lyme disease and complex partial seizures. *J Spiro Tick-borne Dis*. 1999; 6:123-125 .
53. Bransfield RC. Diagnosis, treatment, and prevention of Lyme disease. *JAMA*. 1998 Sep 23-30;280(12):1049; author reply 1051.
54. Bransfield RC. Lyme disease, comorbid tick-borne diseases, and neuropsychiatric disorders. *Psychiatric Times*. 2007 Dec; 24(14):59-61
55. Bransfield RC. Neuropsychiatric Lyme Borreliosis: An Overview with a Focus on a Specialty Psychiatrist's Clinical Practice. *Healthcare (Basel)* 2018 Sep; 6(3): 104. doi: 10.3390/healthcare6030104
56. Bransfield RC. Preventable cases of autism: relationship between chronic infectious disease and

- neurological outcome. *Pediatric Health*. (2009) April 3(2).
57. Bransfield RC. Relationship of Inflammation and Autoimmunity to Psychiatric Sequelae in Lyme Disease. *Psychiatric Ann*. 2012 42(9):337-41
  58. Bransfield RC. The diagnosis of Lyme disease. *Hosp Pract (Minneap)*. 1996 Aug 15;31(8):35, 40.
  59. Bransfield RC, Kuhn M. Autism and Lyme disease. *JAMA*. 2013 Aug 28;310(8):856-7.
  60. Bransfield RC. The psychoimmunology of Lyme and associated diseases. *Neurology, Psychiatry & Brain Research*. (2014) 20(1);8.
  61. Bransfield RC. Intrusive symptoms and infectious encephalopathies. *Neurol Psychiatr Brain Res*. 2016; 22(1): 3-4.
  62. Bransfield RC. Can infections and immune reactions to them cause violent behavior? *Neurology, Psychiatry and Brain Research*. 2012-03.  
DOI: 10.1016/j.npbr.2012.02.006
  63. Bransfield RC, Relationship of Inflammation and Autoimmunity to Psychiatric Sequelae in Lyme Disease *Psychiatric Annals*. 2012-09-01.  
DOI: 10.3928/00485713-20120906-07
  64. Bransfield RC. The diagnosis of Lyme disease. *Hospital practice* 1996. Diagnosis, Treatment, and Prevention of Lyme Disease *JAMA* 1998-09  
DOI: 10.1001/jama.280.12.1049
  65. Breitschwerdt EB, Bradley JM, Maggi RG, Lashnits E, Reicherter P. *Bartonella* Associated Cutaneous Lesions (BACL) cutaneous lesions in people with neuropsychiatric symptoms. *Pathogens* 2020;9:1023.
  66. Breitschwerdt EB, Maggi RG, Cadenas MB, Vissotto de Paiva Diniz PP. A groundhog, a novel *Bartonella* sequence, and my father's death. *Emerg Infect Dis*. 2009 Aug;15(12): 2080-6.
  67. Breitschwerdt EB, Maggi RG, Duncan AW, Nicholson WL, Hegarty BC, Woods CW. *Bartonella* species in blood of immunocompetent persons with animal and arthropod contact. *Emerg Infect Dis* 13: 938-941, 2007.
  68. Breitschwerdt EB, Maggi RG, Farmer P, Mascarelli PE. Molecular evidence of perinatal transmission of *Bartonella vinsonii* subsp. *berkhoffii* and *B. henselae* to a child. *J Clin Microbiol*. 2010; 48: 2289-2293.
  69. Breitschwerdt EB, Maggi RG, Lantos PM, Woods CW, Hegarty BC, Bradley JM. *Bartonella vinsonii* subsp. *berkhoffii* and *Bartonella henselae* in a father and daughter with neurological disease. *Parasites and Vectors* 2010; 3: 29.
  70. Breitschwerdt EB, PE Mascarelli, LA Schweickert, RG Maggi, BC Hegarty, JM Bradley, CW Woods: Hallucinations, sensory neuropathy, and peripheral visual deficits in a young woman infected with *Bartonella koehlerae*. *J Clin Microbiol* 2011; 49: 3415-3417.
  71. Breitschwerdt EB, Greenberg R, Maggi RG, Mozayani BR, Lewis A, Bradley JM. *Bartonella henselae* Bloodstream Infection in a Boy with Pediatric Acute-Onset Neuropsychiatric Syndrome. *J Cent Nerv Syst Dis*. 2019; 11: 1179573519832014. doi: 10.1177/1179573519832014
  72. Breitschwerdt EB. Bartonellosis, One Health and all creatures great and small. *Vet Dermatol*. 2017 Feb;28(1):96-e21.
  73. Breitschwerdt EB. Maggi RG, Nicholson WL, Cherry NA, Woods CW. *Bartonella* sp. bacteremia in patients with neurological and neurocognitive dysfunction. *J Clin Microbiol*. 2008;46(9):2856-2861.
  74. Breitschwerdt EB, Mascarelli PE, Schweickert LA, Maggi RG, Hegarty BC, Bradley JM, Woods CW. Hallucinations, sensory neuropathy, and peripheral visual deficits in a young woman infected with *Bartonella koehlerae*. *J Clin Microbiol*. 2011, 49(9):3415-7. doi: 10.1128/JCM.00833-11.
  75. Breitschwerdt EB, Sontakke S, Hopkins S. Neurological Manifestations of Bartonellosis in Immunocompetent Patients: A composite of reports from 2005-2012. *J Neuroparasitol*. 2013, 3:1- 15. <http://www.ashdin.com/journals/jnp/235640.pdf>

76. Brinck T, Hansen K, Olesen J. Headache resembling tension-type headache as the single manifestation of Lyme neuroborreliosis. *Cephalalgia*. 1993 Jun;13(3):207-9.
77. Brodzinski S, Nasierowski T. Psychosis in *Borrelia burgdorferi* infection-part I: epidemiology, pathogenesis, diagnosis and treatment of neuroborreliosis. *Psychiatr. Pol.* 2019; 53(3): 629-640. [www.psychiatriapolska.pl](http://www.psychiatriapolska.pl) DOI: <http://doi.org/10.12740/PP/97336>.
78. Brodzinski S, Nasierowski T. Psychosis in *Borrelia burgdorferi* infection-part I: case reports. *Psychiatr. Pol.* 2019; 53(3): 641-653. [www.psychiatriapolska.pl](http://www.psychiatriapolska.pl) DOI: <http://doi.org/10.12740/PP/92556>
79. Brown JS Jr. Geographic correlation of schizophrenia to ticks and tick-borne encephalitis. *Schizophr Bull* 1994;20(4):755-75.
80. Bujak DI, Weinstein A, Dornbush RL. Clinical and neurocognitive features of the post Lyme syndrome. 1996, 23(8):1392-1397
81. Burakgazi AZ. Lyme disease-induced polyradiculopathy mimicking amyotrophic lateral sclerosis. *Int J Neurosci*. 2014 Nov;124(11):859-62.
82. David R. Burdge, David P. O'Hanlon, Experience at a Referral Center for Patients with Suspected Lyme Disease in an Area of Nonendemicity: First 65 Patients, *Clinical Infectious Diseases*, Volume 16, Issue 4, April 1993, Pages 558–560, <https://doi.org/10.1093/clind/16.4.558>
83. Burns RB, Hartman EE. A 58-year-old man with a diagnosis of chronic Lyme disease, 1 year later. *JAMA*. 2003 Dec 24;290(24):3247.
84. Caliendo MV, Kushon DJ, Helz JW. Delirium and Lyme disease. *Psychosomatics*. 1995 Jan-Feb;36(1):69-74.
85. Cameron DC. Medical Hypotheses. Clinical trials validate the severity of persistent Lyme disease symptoms. 2009, 72(2):153-6. <https://doi.org/10.1016/j.mehy.2008.09.030>
86. Cameron D, Gaito A, Harris N, Bach G, Bellocin S, Bock K, Bock S, Burrascano J, Dickey C, Horowitz R, Phillips S, Meer-Scherrer L, Raxlen B, Sherr V, Smith H, Smith P, ILADS Working Group. Evidence-based guidelines for the management of Lyme disease. *Expert Review of Anti-infective Therapy* [01 Jan 2004, 2(1 Suppl):S1-13] 2004/01. DOI: 10.1586/14789072.2.1.S1
87. Cameron D. Severity of Lyme disease with persistent symptoms. Insights from a double-blind placebo-controlled clinical trial. *Minerva Med.* 2008 Oct;99(5):489-96.
88. Cameron DJ. Consequences of treatment delay in Lyme disease. *J Eval Clin Pract.* 2007 Jun;13(3):470-2.
89. Cameron DJ. Proof That Chronic Lyme Disease Exists. *Interdiscip Perspect Infect Dis*. 2010; 2010: 876450. doi: 10.1155/2010/876450
90. Carithers HA, Margileth AM. Cat-scratch disease. Acute encephalopathy and other neurologic manifestations. *Am J Dis Child*. 1991;145(1):98-101. doi: 10.1001/archpedi.1991.02160010104026.
91. Carter CJ. Schizophrenia: A Pathogenetic Autoimmune Disease Caused by Viruses and Pathogens and Dependent on Genes] *Pathog*. 2011; 2011: 128318. doi: 10.4061/2011/128318
92. Cees C. van den Wijngaard, Agnetha Hofhuis, Margriet G. Harms, Juanita A. Haagsma, Albert Wong, G.A. de Wit, Arie H. Havelaar, Anna K. Lugner, Anita W.M. Suijkerbuijk, Wilfrid van Pelt, The burden of Lyme borreliosis expressed in disability-adjusted life years, *European Journal of Public Health*, Volume 25, Issue 6, December 2015, Pages 1071–1078, <https://doi.org/10.1093/eurpub/ckv091>
93. Cetin B. Ultra-Super Spirochete Bacteria (*Borrelia burgdorferi*) has been Preparing the End of Human Generation! Are You Aware! *European J Biomedical Pharmaceutical Sci.* 2019, Volume 6, Issue 13, 244-248. [https://www.ejbps.com/ejbps/abstract\\_id/6345](https://www.ejbps.com/ejbps/abstract_id/6345)
94. Chabria SB, Lawrason J. Altered mental status, an unusual manifestation of early disseminated Lyme disease: A case report. *J Med Case Reports*. 2007 Aug 9;1:62.
95. Chan L, Reilly KM, Snyder HS. An unusual presentation of cat scratch encephalitis. *J Emerg Med*. 1995 Nov-Dec;13(6):769-72.
96. Chandra AM, Keilp JG, Fallon BA. Correlates of Perceived Health-Related Quality of Life in Post-

treatment Lyme Encephalopathy. *Psychosomatics*. 2013 Jul 9.

97. Chandra A et al. Anti-neural antibody reactivity in patients with a history of Lyme borreliosis and persistent symptoms. *Brain Behav Immun*. Author manuscript; available in PMC 2011 Aug 1. Published in final edited form as: *Brain Behav Immun*. 2010 Aug; 24(6): 1018–1024. doi: 10.1016/j.bbi.2010.03.
98. Chavda V, Patel S. Lyme Neuroborreliosis - The Mystifying Pitfall: Neuropathology and Current Therapeutics. *Recent Pat Antiinfect Drug Discov*. 2019 Mar 26. doi: 10.2174/1574891X14666190327114641.
99. Cheherama M, Zagardo MT, Koski CL. Subarachnoid hemorrhage in a patient with Lyme disease. *Neurology*. 1997;48:520-523
100. Cleveland WL, DeLaPaz RL, Fawwaz RA, Challop RS. High-Dose Glycine Treatment of Refractory Obsessive-Compulsive Disorder and Body Dysmorphic Disorder in a 5-Year Period. *Neural Plast*. 2009; 2009: 768398. doi: 10.1155/2009/768398
101. Cintron R, Pachner AR. Spirochetal diseases of the nervous system. *Curr Opin Neurol*. 1994 Jun;7(3):217-22. Review.
102. Citera M, Freeman PR, Horowitz RI. Empirical validation of the Horowitz Multiple Systemic Infectious Disease Syndrome Questionnaire for suspected Lyme disease. *Int J Gen Med*. 2017; 10: 249–273. doi: 10.2147/IJGM.S140224
103. Clarissou J, Song A, Bernede C, Guillemot D, Dinh A, Ader F, Perronne C, Salomon J. Efficacy of a long-term antibiotic treatment in patients with a chronic Tick Associated Poly-organic Syndrome (TAPOS). *Med Mal Infect*. 2009 Feb;39(2):108-15. Epub 2009 Jan 4.
104. Clark IA. Chronic cerebral aspects of long COVID, post-stroke syndromes and similar states share their pathogenesis and perispinal etanercept treatment logic. *Pharmacol Res Perspect*. 2022 Apr;10(2):e00926. doi: 10.1002/prp2.926. Erratum in: *Pharmacol Res Perspect*. 2022 Apr;10(2):e00942. PMID: 35174650; PMCID: PMC8850677.
105. Cochat Costa Rodrigues, M., Moreira, I., Peixoto, M., & Silveira, C. (2017). The New Great Imitator – Neuropsychiatric Symptoms of Lyme Disease. *European Psychiatry*, 41(S1), S232-S232. doi:10.1016/j.eurpsy.2017.01.2242
106. Coetzer BR. Obsessive-Compulsive Disorder following Brain Injury: A Review. *The International Journal of Psychiatry in Medicine*. 2004, 34(2) <https://doi.org/10.2190/XENN-NNWT-7N2K-R26A>
107. Corral I, Sanchis G, Garcia-Ribas G, Quereda C, Escudero R, de Blas G. Demyelinating polyradiculitis in neuroborreliosis. *Neurologia*. 1995 Feb;10:110-113
108. Cowley G, Underwood A. A disease in disguise. Lyme can masquerade as migraine, or as madness. *Newsweek*. 2004 Aug 23;144(8):62.
109. Coyle PK, Deng Z, Schutzer SE, Belman AL, Benach J, Krupp LB, Luft B. Detection of *Borrelia burgdorferi* antigens in cerebrospinal fluid. *Neurology* 1993;43:1093-1097.
110. Coyle PK, Schutzer SE, Deng Z, Krupp LB, Belman AL, Benach JL, Luft BJ. Detection of *Borrelia burgdorferi*-specific antigen in antibody-negative cerebrospinal fluid in neurologic Lyme disease. *Neurology*. 1995 Nov;45(11):2010-5.
111. Créange A. Clinical manifestations and epidemiological aspects leading to a diagnosis of Lyme borreliosis: neurological and psychiatric manifestations in the course of Lyme borreliosis *Med Mal Infect*. 2007 Jul-Aug;37(7-8):532-9. Epub 2007 Mar 26.
112. Cross A, Bouboulis D, Shimasaki C, Jones CR. Case Report: PANDAS and Persistent Lyme Disease With Neuropsychiatric Symptoms: Treatment, Resolution, and Recovery. *Front Psychiatry*. 2021 Feb 2;12:505941. doi: 10.3389/fpsy.2021.505941.
113. Császár T, Patakfalvi A. Differential diagnostic problems in Lyme disease - *Borrelia* infection resulting in acute exogenous psychosis. *Orv Hetil*. 1994 Oct 9;135(41):2269- 71.
114. Davidsson, M. The Financial Implications of a Well-Hidden and Ignored Chronic Lyme Disease Pandemic. *Healthcare* **2018**, 6, 16. <https://doi.org/10.3390/healthcare6010016>
115. Dattwyler RJ, Halperin JJ. Failure of tetracycline therapy in early Lyme disease. *Arthritis Rheum*.

1987 Apr;30(4):448- 50.

116. Dekonenko EP, Umanskii KG, Virich IE, Kupriianova LV, Rudometov, IuP, Bagrov FI The basic syndromes of neurological disorders in Lyme borreliosis. *Ter Arkh* 1995; 67 (11) : 52-53
117. Delaney, S.L., Murray, L.A., Fallon, B.A. (2022). Neuropsychiatric Symptoms and Tick-Borne Diseases. In: *Current Topics in Behavioral Neurosciences*. Springer, Berlin, Heidelberg.  
[https://doi.org/10.1007/7854\\_2022\\_406](https://doi.org/10.1007/7854_2022_406)
118. DeLuca J, Johnson SK, Beldowicz D, et al. Neuropsychological impairments in chronic fatigue syndrome, multiple sclerosis, and depression. *Journal of Neurology, Neurosurgery & Psychiatry* 1995;58:38-43.
119. Dersch R, Rauer S. Neuroborreliosis - Diagnostics, treatment and course. *Nervenarzt*. 2017 Apr;88(4):419-431. doi: 10.1007/s00115-016-0263-1.
120. Dersch R, Sarnes AA, Maul M. Quality of life, fatigue, depression and cognitive impairment in Lyme neuroborreliosis. *Journal of Neurology*, 2015, 262(11):2572
121. Dolapihilla, B., Elapatha, D. M., & Grimm, J. (2021). Association of Spirochetes and Lyme Disease with Morgellons Disease. *Asian Journal of Applied Science and Engineering*, 10(1), 30–34.  
<https://doi.org/10.18034/ajase.v10i1.21>
122. Donta ST, Noto RB, Vento JA. SPECT Brain Imaging in Chronic Lyme Disease. *Clinical Nuclear Medicine & Volume 37, Number 9, September 2012*
123. Doshi S, Keilp JG, Strobino B, McElhiney M, Rabkin J, Fallon BA. Depressive Symptoms and Suicidal Ideation Among Symptomatic Patients with a History of Lyme Disease vs Two Comparison Groups. *Psychosomatics*. 2018 Sep-Oct;59(5):481-489. doi: 10.1016/j.psych.2018.02.004.
124. Druschky K, Stefan H, Grehl H, Neundörfer B. Secondary normal pressure hydrocephalus. A complication of chronic neuroborreliosis. *Nervenarzt*. 1999 Jun;70(6):556-9. German.
125. Dupeyron A, Lecocq J, Jaulhac B, et al. Sciatica, disk herniation, and neuroborreliosis. A report of four cases. *Joint Bone Spine*. 2004; 71: 433-437.
126. Dupuis MJ. Multiple neurologic manifestations of *Borrelia burgdorferi* infection. *Rev Neurol (Paris)* 1988;144(12):765- 75
127. Edelstyn NM, Hunter B, Ellis SJ. Bilateral dorsolateral thalamic lesions disrupts conscious recollection. *Neuropsychologia*. 2006;44(6):931-8. Epub 2005 Oct 25.
128. Eikeland R, Mygland A, Herlofson K, Ljøstad U. European neuroborreliosis: quality of life 30 months after treatment. *Acta Neurol Scand*. 2011 Nov;124(5):349- 54.
129. Elkins LE, Pollina DA, Scheffer SR, Krupp LB. Psychological states and neuropsychological performances in chronic Lyme disease. *Appl Neuropsychol* 1999;6(1):19-26.
130. Embers ME, Ramamoorthy R, Philipp MT. Survival strategies of *Borrelia burgdorferi*, the etiologic agent of Lyme disease. *Microbes Infect*. 2004 Mar;6(3):312-8. doi: 10.1016/j.micinf.2003.11.014 Survival strategies of *Borrelia burgdorferi*, the etiologic agent of Lyme disease - PubMed (nih.gov)
131. Engman M-L, Lindström K, Sallamba M, Hertz C, et al. One-year follow-up of tick-borne central nervous system infections in childhood. *Pediatric Infect Dis J*. 2012; 31(6): 570-4.
132. Eskow E, Rao RV, Mordechai E. Concurrent infection of the central nervous system by *Borrelia burgdorferi* and *Bartonella henselae*: evidence for a novel tick-borne disease complex. *Arch Neurol*. 2001 Sep;58(9):1357- 63.
133. Etienne M, Carvalho P, Fauchais AL, Pestel-Caron M, Doucet J, Chassagne

- P. Lyme neuroborreliosis revealed as a normal pressure hydrocephalus: a cause of reversible dementia. *J Am Geriatr Soc.* 2003 Apr;51(4):579-80.
134. Etter E J, Trivitt S J, Bosse B L, et al. (August 15, 2023) Abnormal Presentation of Bartonella henselae Encephalopathy in a Pediatric Patient. *Cureus* 15(8): e43535. doi:10.7759/cureus.43535
  135. Fallon BA, Keilp JG, Corbera KM, Petkova E, Britton CB, Dwyer E, Slavov I, Cheng J, Dobkin J, Nelson DR, Sackeim HA. A randomized, placebo-controlled trial of repeated IV antibiotic therapy for Lyme encephalopathy. *Neurology* Mar 2008, 70 (13) 992-1003; DOI: 10.1212/01.WNL.0000284604.61160.2d
  136. Fallon BA, Madsen T, Erlangsen A, Benros ME. Lyme Borreliosis and Associations with Mental Disorders and Suicidal Behavior: A Nationwide Danish Cohort Study. *Am J Psychiatry.* 2021 Jul 28;appiajp202120091347. doi: 10.1176/appi.ajp.2021.20091347.
  137. Fallon BA, Schwartzberg M, Bransfield R, Zimmerman B, Scotti A, Weber CA, Liebowitz MR. Late-stage neuropsychiatric Lyme borreliosis. Case reports. *Psychosomatics* 1995; 36: 295-300.
  138. Fallon BA, Das S, Plutchok JJ, Tager F, Liegner K, Van Heertum R. Functional brain imaging and neuropsychological testing in Lyme disease. *Clin Infect Dis* 1997; 25 (suppl 1): S57-S63.
  139. Fallon BA, Sotsky J. *Conquering Lyme Disease* (Book) Columbia University Press, 2018
  140. Fallon BA, Bird H, Hoven C, Cameron D, Liebowitz MR, Shaffer S. Psychiatric aspects of Lyme disease in children and adolescents: A community epidemiologic study in Westchester, New York. *J Spiro Tick- Borne Dis* 1994; 1:98-100
  141. Fallon BA, Das S, Plutchok JJ, Tager F, Liegner K, Van Heertum R. Functional Brain Imaging and Neuropsychological Testing in Lyme Disease. *Clin Infect Dis* 1997; 25:S57-63
  142. Fallon BA, Javitch JA, Hollander E, Liebowitz MR. Hypochondriasis and obsessive-compulsive disorder: overlaps in diagnosis and treatment. *J Clin Psychiatry.* 1991; 52(11):457-60.
  143. Fallon BA, Keilp J, Prohovnik I, Heertum RV, Mann JJ. Regional cerebral blood flow and cognitive deficits in chronic Lyme disease. *J Neuropsychiatry Clin Neurosci.* 2003 Summer;15(3):326-32.
  144. Fallon BA, Kochevar JM, Gaito A, Nields JA. The underdiagnosis of neuropsychiatric Lyme disease in children and adults. *Psychiatr Clin North Am.* 1998; 21: 693-703
  145. Fallon BA, Levin ES, Schweitzer PJ, Hardesty D. Inflammation and central nervous system Lyme disease. *Neurobiol Dis.* 2010 Mar;37(3):534-41.
  146. Fallon BA, Lipkin RB, Corbera KM, Yu S, Nobler MS, Keilp JG, Petkova E, Lisanby SH, Moeller JR, Slavov I, Van Heertum R, Mensh BD, Sackeim HA. Regional cerebral blood flow and metabolic rate in persistent Lyme encephalopathy. *Arch Gen Psychiatry.* 2009 May;66(5):554-63.
  147. Fallon BA, Nields JA Acute disseminated encephalomyelitis [letter]. *J Neuropsychiatry Clin Neurosci* 1998 Summer;10(3):366-7
  148. Fallon BA, Nields JA, Burrascano JJ, Liegner K, DelBene D, Liebowitz MR. The neuropsychiatric manifestations of Lyme Borreliosis. *Psychiatric Quarterly* 1992; 63: 95- 117.
  149. Fallon BA, Nields JA, Parsons B, Liebowitz MR, Klein DF. Psychiatric manifestations of Lyme borreliosis. *J Clin Psychiatry* 1993 Jul;54(7):263-8
  150. Fallon BA, Nields JA. Lyme Disease: A neuropsychiatric illness. *Am J Psychiatry* 1994 Nov;151(11):1571-83
  151. Fallon BA, Petkova E, Keilp JG, Britton CB. Ongoing discussion about the US clinical Lyme trials. *Am J Med.* 2014 Feb;127(2):e7.
  152. Fallon BA, Keilp JG, Corbera KM, Petkova K, Britton CB, Dwyer E, et al. A randomized, placebo-controlled trial of repeated IV antibiotic therapy for Lyme encephalopathy. *Neurology* 2008; 70: 992-1003.



153. Fallon BA, Petkova E, Keilp JG, Britton CB. A reappraisal of the U.S. clinical trials of post-treatment Lyme disease syndrome. *Open Neurol J.* 2012; 6:79-87.
154. Fallon BA, Vaccaro B, Romano M, Clemente D. Neuropsychiatric and neuropathologic aspects of Lyme disease. *Psychiatric Annals.* 2006;36:120- 128.
155. Fallon BA, Weis N, Tager F, Fein L, Liegner K, Liebowitz MR. Repeated antibiotic therapy in chronic Lyme disease. *J Spiro Tick-Borne Dis.* 1999; 6: 1-9.
156. Fallon BA, Keilp J, Prohovnik I, Heertum RV, Mann JJ. Regional cerebral blood flow and cognitive deficits in chronic Lyme disease. *J Neuropsychiatry Clin Neurosci* 2003; 15: 326-332.
157. Fallon BA, Zubcevik N, Bennett C, Doshi S, Rebman AW, Kishon R, Moeller JR, Octavien NR, Aucott JN. The General Symptom Questionnaire- 30 (GSQ-30): A Brief Measure of Multi-System Symptom Burden in Lyme Disease. *Front Med (Lausanne).* 2019 Dec 6;6:283. doi: 10.3389/fmed.2019.00283. PMID: 31867334; PMCID: PMC6908481.
158. Farber S. 34 Years of Documentation of Maternal-Child Transmission of Lyme Disease and Congenital Lyme Borreliosis - A Review. *LymeHope.* 2019. updated\_june\_26\_2019\_-\_32\_years\_of\_literature\_review.pdf (ledroitdeguerir.com)
159. Farshad-Amacker NA, Scheffel H, Frauenfelder T, Alkadhi H. Brainstem abnormalities and vestibular nerve enhancement in acute neuroborreliosis. *BMC Research Notes* 2013; 6: 551.
160. Ferroir JP, Reignier A, Nicolle MH, Guillard A. Meningoradiculoencephalitis in Lyme disease. A case with major regressive mental disorders. *Presse Med.* 1988 Apr 16;17(14):697.
161. Flegr JI, Preiss M, Balátová P. Depressiveness and Neuroticism in Bartonella Seropositive and Seronegative Subjects-Preregistered Case- Controls Study. *Front Psychiatry.* 2018 Jul 13;9:314. doi: 10.3389/fpsy.2018.00314. eCollection 2018.
162. Flegr J, Hodný Z. Cat scratches, not bites, are associated with unipolar depression--cross-sectional study. *Parasit Vectors.* 2016 Jan 5;9:8. doi: 10.1186/s13071-015-1290-7. PMID: 26728406; PMCID: PMC4700762.
163. Ford L, Tufts DM. Lyme Neuroborreliosis: Mechanisms of *B. burgdorferi* Infection of the Nervous System. *Brain Sciences.* 2021; 11(6):789. <https://doi.org/10.3390/brainsci11060789>
164. Fox JW, Studley JK, Cohen DM. Recurrent expressive aphasia as a presentation of cat-scratch encephalopathy. *Pediatrics.* 2007 Mar;119(3):e760-3. doi: 10.1542/peds.2006-1885.
165. Frankovich J, Thienemann M, Rana S, Chang K. Five youth with pediatric acute-onset neuropsychiatric syndrome of differing etiologies. *J Child Adolesc Psychopharmacol.* **2015**, 25(1):31-7. doi: 10.1089/cap.2014.0056.
166. Fritzsche M. Seasonal correlation of sporadic schizophrenia to Ixodes ticks and Lyme borreliosis. *Int J Health Geogr.* 2002; 1:2
167. Fritzsche M. Geographical and seasonal correlation of multiple sclerosis to sporadic schizophrenia. *Int J Health Geogr.* 2002 Dec 20;1(1):5.
168. Frykholm BO. On the question of infectious aetiologies for multiple sclerosis, schizophrenia and the chronic fatigue syndrome and their treatment with antibiotics. *Med Hypotheses* 2010 Apr;74(4):758-60.
169. Gadila SKG, Rosoklija G, Dwork AJ, Fallon BA, Embers ME. Detecting Borrelia Spirochetes: A Case Study With Validation Among Autopsy Specimens. *Front Neurol.* 2021 May 10;12:628045. doi: 10.3389/fneur.2021.628045.
170. Garakani A, Mitton AG. New-onset panic, depression with suicidal thoughts, and somatic symptoms in a patient with a history of Lyme disease. *Case Rep Psychiatry.* 2015;2015:457947.
171. Garcia-Monco JC, Benach JL. Lyme neuroborreliosis. *Ann Neurol* 1995 Jun; 37: 691-70.
172. García-Moncó JC, Benach JL Neurological manifestations of Lyme disease. *Enferm Infec*

Microbiol Clin. 1989 Nov;7(9):501-6.

173. Garcia-Monco JC, Villar BF, Alen JC, Benach JL. *Borrelia burgdorferi* in the central nervous system: experimental and clinical evidence for early invasion. *J Infect Dis*. 1990 Jun;161(6):1187-93.
174. García-Moreno JM, Izquierdo G, Chacón J, Angulo S, Borobio MV. Neuroborreliosis in a patient with progressive supranuclear paralysis. An association or the cause? *Rev Neurol*. 1997 Dec;25(148):1919-21.
175. Gardner, T. Lyme disease. In *Infectious Diseases of the Fetus and Newborn Infant*. 4th ed.; Remington, J.S., Klein, J.O., Eds.; W.B. Saunders Company: Philadelphia, USA, 1995; pp. 447-528, gardner2c-tesa2c-lyme-disease2c- infectious-diseases-of-the-fetus-and-newborn-infant2c-1995.pdf (tekenbeetziekten.nl)
176. Gardner, T. Lyme disease. In *Infectious Diseases of the Fetus and Newborn Infant*. 5th ed.; Remington, J.S., Klein, J.O., Eds.; W.B. Saunders Company: Philadelphia, USA, 2001; Chapter 11, pp. 519-641, ISBN: 0-7216-7976-5. Download PDFs: Part 1 (5MB) | Part 2 (6MB) | Part 3 (8MB) | Part 4 (8MB) Leading Research - ILADS
177. Gaudet EM, Gould ON, Lloyd V. Parenting When Children Have Lyme Disease: Fear, Frustration, Advocacy. *Healthcare (Basel)*. 2019 Aug 8;7(3). pii: E95. doi: 10.3390/healthcare7030095.
178. Gasse T, Murr C, Meyersbach P, Schmutzhard E, Wachter H, Fuchs D. Neopterin production and tryptophan degradation in acute Lyme neuroborreliosis versus late Lyme encephalopathy. *Eur J Clin Chem Clin Biochem*. 1994 Sep;32(9):685-9.
179. Gaudino EA, Coyle PK, Krupp LB. Post-Lyme syndrome and chronic fatigue syndrome. Neuropsychiatric similarities and differences. *Arch Neurol*. 1997 Nov;54(11):1372-6.
180. Gentile I, Zappulo E, Militeri R, Pascotto A, Borgia G, Bravaccio C. Etiopathogenesis of autism spectrum disorders: Fitting the pieces of the puzzle together. *Med Hypotheses*. 2013 Jul;81(1):26-35.
181. Gerber A, Zalneraitis L. Childhood neurologic disorders and Lyme disease during pregnancy. *Pediatric Neurology*. 1994 11(1):41-44 [https://doi.org/10.1016/0887-8994\(94\)90088-4](https://doi.org/10.1016/0887-8994(94)90088-4)
182. Geschwind MD, Josephs KA, Parisi JE, B. Keegan M. A 54-year-old man with slowness of movement and confusion. *Neurology*. Author manuscript; available in PMC 2009 Feb 6. Published in final edited form as: *Neurology*. 2007 Nov 6; 69(19): 1881–1887. doi: 10.1212/01.wnl.0000290370.14036.69
183. Geschwind MD, Shu H, Haman A, Sejvar JJ, Miller BL. Rapidly Progressive Dementia. *Ann Neurol*. Author manuscript; available in PMC 2009 Feb 25. Published in final edited form as: *Ann Neurol*. 2008 Jul; 64(1): 97–108. doi: 10.1002/ana.21430
184. Geschwind MD, Haman A, Miller BL. Rapidly Progressive Dementia. *Neurol Clin*. Author manuscript; available in PMC 2009 Jul 6. Published in final edited form as: *Neurol Clin*. 2007 Aug; 25(3): 783–vii. doi: 10.1016/j.ncl.2007.04.001
185. George TI, Manley G, Koehler JE, Hung VS, McDermott M, Bollen A. Detection of *Bartonella henselae* by polymerase chain reaction in brain tissue of an immunocompromised patient with multiple enhancing lesions. Case report and review of the literature. *J Neurosurg*. 1998 Oct;89(4):640-4.
186. Gerstenblith TA, Stern TA. Lyme disease: a review of its epidemiology, evaluation, and treatment. *Psychosomatics*. 2014 Sep-Oct;55(5):421-9.
187. Gheorghiev C, De Montleau F, Defuentes G. Alcohol and epilepsy: A case report between alcohol withdrawal seizures and neuroborreliosis. *Encephale* 2011 Jun;37(3):231-7.

188. GIANNUZZI TR, S. DAINI S, L. BERNARDINI L, L. PETRONGOLO L, SILVER NG. Psychiatric emergencies (part III): psychiatric symptoms resulting from organic diseases. *Eur Rev Med Pharmacol Sci.* 013;17(Suppl 1):86-99.
189. Gimsing LN, Hejl AM. Normal pressure hydrocephalus secondary to Lyme disease, a case report and review of seven reported cases. *BMC Neurol.* 2020 Sep 16;20(1):347. doi: 10.1186/s12883-020-01917-8.
190. Maryna Golovchenko, Jakub Opelka, Marie Vancova, Hana Sehadova, Veronika Kraliková, Martin Dobias, Milan Raska, Michal Krupka, Kristyna Sloupenská, Natalie Rudenko. Concurrent infection of human brain with multiple species of Lyme disease spirochetes. *bioRxiv* 2023.04.27.538619; doi: <https://doi.org/10.1101/2023.04.27.538619> (In review)
191. Gorlyn M, Keilp JG, Fallon BA. Language Fluency Deficits in Post-treatment Lyme Disease Syndrome. *Arch Clin Neuropsychol.* 2022 Dec 22;acac095. doi: 10.1093/arclin/acac095.
192. Greenberg R Aggressiveness, violence, homicidality, homicide and Lyme disease. *Neuropsychiatric Disease and Treatment* Letter to the Editor May 2018
193. Greenberg HE, Ney G, Scharf SM, Ravdin L, Hilton E. Sleep quality in Lyme disease. *Sleep.* 1995 Dec;18(10):912-6.
194. Greenberg R. Chronic Lyme Disease: An Unresolved Controversy. *Am J Med.* 2017 Sep;130(9):e423. doi: 10.1016/j.amjmed.2017.03.043. PMID: 28838739.
195. Greenberg R. Commentary Re: a critical appraisal of the mild axonal peripheral neuropathy of late neurologic Lyme disease, by Wormser et al. *DMID* 2016. *Diagn Microbiol Infect Dis.* 2017 May;88(1):106. doi: 10.1016/j.diagmicrobio.2017.01.017. Epub 2017 Feb 8. PubMed PMID: 28365059.
196. Greenberg R Commentary re: "Efficacy of a 14-day course of amoxicillin for patients with erythema migrans" by Wormser et al. *DMID* 2019 Sep; 95 (1): 104
197. Greenberg R Commentary re: Multiple Sclerosis and psychosis: A case report. Cheema J, Huyh AC. *Prat SS.* 2019 Jun 3;34:158-161. (2019-09-21)
198. Greenberg R. Correspondence re: M Monaghan et al. Pediatric Lyme disease: systematic assessment of post-treatment symptoms and quality of life. *Pediatr Res* (2023). <https://doi.org/10.1038/s41390-023-02720-0>
199. Greenberg R. Infections and childhood psychiatric disorders: Tick-borne illness and bipolar disorder in youth. *Bipolar Disord.* 2017; 3:1.
200. Greenberg R Long-Term Assessment of Health-Related Quality of Life in Patients with Culture-Confirmed Early Lyme Disease *Clinical Infectious Diseases* Volume 61 Issue 2 Letter to the Editor July 2015
201. Greenberg R Pediatric Autoimmune Neuropsychiatric Disorders Associated with Streptococcal Infections(PANDAS) and Pediatric Acute-Onset Neuropsychiatric Syndromes (PANS) vs Pediatric Bipolar Disorder – A Possible Connection? *Neurology, Psychiatry & Brain Research* Letter to the Editor August 2015
202. Greenberg R Pediatric Autoimmune Neuropsychiatric Disorders Associated with Streptococcal Infections(PANDAS) and Pediatric Acute-Onset Neuropsychiatric Syndromes (PANS) vs Pediatric Bipolar Disorder – A Possible Connection? *Neurology, Psychiatry & Brain Research* July 2014
203. Greenberg R. Support for a Connection Between Pediatric Bipolar Disorder and Tick- Borne Infections. *J Affect Disord.* 2023, 12, 100543, ISSN 2666-9153, <https://doi.org/10.1016/j.jadr.2023.100543> .
204. Greenberg R. The Role of Infection and Immune Responsiveness in a Case of Treatment-Resistant Pediatric Bipolar Disorder. *Front. Psychiatry*, 22 May 2017 | <https://doi.org/10.3389/fpsyt.2017.00078>
205. Greenberg R Study Design Questions Regarding Long-Term Assessment of Health- Related Quality of Life in Patients with Culture-Confirmed Early Lyme Disease *Clinical Infectious Diseases* Letter to the Editor December 2015
206. Greenblatt D, Krupp LB, Belman AL Parainfectious meningo-encephalo- radiculo-myelitis (cat scratch disease, Lyme borreliosis, brucellosis, botulism, legionellosis, pertussis, mycoplasma). *Handb Clin Neurol* 2013; 112: 1195-207.

207. Grzywa A, Karakuła H, Górecka J, Chuchra M. Delusional disorders in the course of tick-born encephalitis and borreliosis in patients with hemophilia A and posttraumatic epilepsy--diagnostic and therapeutic difficulties *Pol Merkur Lekarski*. 2004 Jan;16(91):60- 3. Polish.
208. Gueglio B, Raffi F, Marjolet M. Lyme neuroborreliosis of mental manifestation. Apropos of a case. *Rev Med Interne*. 1996;17(7):599. [French]
209. Gustaw K, Beltowska K, Dlugosz E. Co-existence of toxoplasmosis and neuroborreliosis - a case report. *Ann Agric Environ Med*. 2005;12(2):305-8.
210. Gustaw K, Beltowska K, Studzinska MM. Neurological and psychological symptoms after the severe acute neuroborreliosis. *Ann Agric Environ Med* 2001;8(1):91-4
211. Gustaw-Rothenberg K. Cognitive impairments after tick-borne encephalitis. *Dement Geriatr Cogn Disord*. 2008;26:165-168.
212. Haass A. Lyme neuroborreliosis. *Curr Opin Neurol*. 1998;11:253-258.
213. Hájek T, Libiger J, Janovská D, Hájek P, Alda M, Höschl C. Clinical and demographic characteristics of psychiatric patients seropositive for *Borrelia burgdorferi*. *Eur Psychiatry*. 2006 Mar;21(2):118-22.
214. Hajek T, Paskova B, Janovska D, Bahbouh R, Hajek P, Libiger J, Hoschl C. Higher prevalence of antibodies to *Borrelia burgdorferi* in psychiatric patients than in healthy subjects. *Am J Psychiatry* 159:297-301, February 2002.
215. Halperin JJ, Luft BJ, Anand AK, Roque CT, Alvarez O, Volkman DJ, Dattwyler RJ. Lyme neuroborreliosis: central nervous system manifestations. *Neurology*. 1989 Jun;39(6):753-9.
216. Halperin JJ. Prolonged Lyme disease treatment: enough is enough. *Neurology* 2008; 70(13): 986-987.
217. Hassett AL, Radvanski DC, Buyske S, Savage SV, Sigal LH. Psychiatric comorbidity and other psychological factors in patients with chronic Lyme disease. *Am J Med*. 2009 Sep;122(9):843-50. doi: 10.1016/j.amjmed.2009.02.022.
218. Harvey RA, Misselbeck WJ, Uphold RE. Cat-scratch disease: an unusual cause of combative behavior. *Am J Emerg Med*. 1991, 9(1):52-3. doi: 10.1016/0735-6757(91)90016-d.
219. Harvey WT, Martz D. Motor neuron disease recovery associated with IV ceftriaxone and anti-Babesia therapy. *Acta Neurol Scand* 2007; 115: 129–131.
220. Helon B, Tluczek TW, Buczyjan A, Adamczyk-Helon A, Wojnarowicz M, Mikula R, Cicinski P, Bojarska J. Polymorphic mental disorders in the course of Lyme borreliosis--case study. *Psychiatr Pol*. 2009 May-Jun;43(3):353-61.
221. Hernandez-Albujar S, Rubio G, Gopar J, Galeote G, Rey R, Gil A. Parasitic delirium in patient with multiorganic pathology: a complex situation. *An Med Interna* 1996 Nov;13(11):549-51 [Spanish]
222. Hess A, Buchmann J, Zetl UK, Henschel S, Schlaefke D, Grau G, Benecke R. *Borrelia burgdorferi* central nervous system infection presenting as an organic schizophrenialike disorder. *Biol Psychiatry* 1999 Mar 15;45(6):795
223. Hesslinger B, Walden J, Normann C. Acute and long-term treatment of catatonia with risperidone. *Pharmacopsychiatry*. 2001 Jan;34(1):25-6. doi: 10.1055/s- 2001-15190.
224. Hildenbrand P, Craven DE, Jone R et al. Lyme Neuroborreliosis: Manifestations of a rapidly emerging zoonosis. *Am J Neuroradiol* 2009;30:1079–87.
225. Hinze-Selch D. Infection, treatment and immune response in patients with bipolar disorder versus patients with major depression, schizophrenia or healthy controls. *Bipolar Disorders*. First published: 04 September 2002, 4(1):81-3. <https://doi.org/10.1034/j.1399-5618.4.s1.32.x>
226. Hodgson R, Belgamwar R, Al-tawarah Y, MacKenzie G The use of atypical antipsychotics in the treatment of schizophrenia in North Staffordshire. *Hum Psychopharmacol*. 2005 Mar;20(2):141-7.
227. Holtze M, Mickiene´ A. Atlas A, Lindquist L, Schwieler L. Elevated cerebrospinal fluid kynurenic acid

levels in patients with tick-borne encephalitis. *J Intern Med.* 2012; 272: 394–401.

228. Horowitz RI, Freeman PR. Precision medicine: retrospective chart review and data analysis of 200 patients on dapsone combination therapy for chronic Lyme disease/post-treatment Lyme disease syndrome: part . *Int J Gen Med.* 2019; 12: 101–119. doi: 10.2147/IJGM.S193608
229. Horowitz RI, Freeman PR. Precision Medicine: The Role of the MSIDS Model in Defining, Diagnosing, and Treating Chronic Lyme Disease/Post Treatment Lyme Disease Syndrome and Other Chronic Illness: Part 2. *Healthcare (Basel)* 2018 Dec; 6(4): 129. Published online 2018 Nov 5. doi: 10.3390/healthcare6040129
230. Horst-G. Markus M, Rojewski MT, Schmitt A, Tumani H, Bechter K, Schmitt M. Flow cytometric analysis of T cell subsets in paired samples of cerebrospinal fluid and peripheral blood from patients with neurological and psychiatric disorders. *Brain, Behavior, and Immunity*, Volume 23, Issue 1, 2009, Pages 134-142, ISSN 0889-1591, <https://doi.org/10.1016/j.bbi.2008.08.003>.
231. Hovius JWR et al. A case of meningoencephalitis by the relapsing fever spirochaete *Borrelia miyamotoi* in Europe. *Lancet* 2013 Aug 17;382:658.
232. Hündersen F, Forst S, Kasten E. Neuropsychiatric and Psychological Symptoms in Patients with Lyme Disease: A Study of 252 Patients. *Healthcare (Basel)*. 2021 Jun 14;9(6):733. doi: 10.3390/healthcare9060733. PMID: 34198647; PMCID: PMC8232147.
233. Hurley RA, Taber KH. Acute and chronic Lyme disease: Controversies for neuropsychiatry. *J Neuropsychiatry Clin Neurosci* 2008;20(1):iv-6.
234. Iero I, Elia M, Cosentino FI, Lanuzza B, Spada RS, Toscano G, Tripodi M, Belfiore A, Ferri R. Isolated monolateral neurosensory hearing loss as a rare sign of neuroborreliosis. *Neurol Sci.* 2004 Apr;25(1):30-3.
235. Imai DM, Barr BC, Daft B, Bertone JJ, Feng S, Hodzic E, Johnston JM, Olsen KJ, Barthold SW. Lyme neuroborreliosis in two horses. *Vet Pathol* 2011; 48: 1151-1157.
236. Issakainen J, Gnehm HE, Lucchini GM, Zbinden R Value of clinical symptoms, intrathecal specific antibody production and PCR in CSF in the diagnosis of childhood Lyme neuroborreliosis. *Klin Padiatr* 1996 May-Jun; 208: 106-109.
237. Izquierdo G, Aguilar J, Barranquero A, Navarro G, Borobio MV, Angulo S, Domínguez I, Quesada MA. Positive anti-*Borrelia* antibodies in patients with clinical manifestations compatible with neuroborreliosis. *Neurologia.* 1992 Feb;7(2):50-4. Spanish.
238. Jacek E, Fallon BA, Chandra A, Crow MK, Wormser GP, Alaedini A. Increased IFN $\alpha$  activity and differential antibody response in patients with a history of Lyme disease and persistent cognitive deficits. *J Neuroimmunol.* 2013 Feb 15;255(1-2):85- 91.<sup>[1]</sup>
239. James FM, Engiles JB, Beech J. Meningitis, cranial neuritis, and radiculoneuritis associated with *Borrelia burgdorferi* infection in a horse. *J Am Vet Med Assoc* 2010; 237: 1180-1185.
240. Jarskog LF, Mattioli MA, Perkins DO, Lieberman JA. First-episode psychosis in a managed care setting: clinical management and research. *Am J Psychiatry.* 2000 Jun;157(6):878-84.
241. Johnco C, Kugler BB, Murphy TK, Storch EA. Obsessive-compulsive symptoms in adults with Lyme disease. *Gen Hosp Psychiatry.* 2018 Jan 31;51:85-89. doi: 10.1016/j.genhosppsych.2018.01.009.
242. Johnson L, Wilcox S, Mankoff J, Stricker RB. Severity of chronic Lyme disease compared to other chronic conditions: a quality of life survey. *PeerJ.* 2014 Mar 27;2:e322. doi: 10.7717/peerj.322.
243. Jovanovic J, Cvjetkovic D, Vukadinov J. Lyme disease--neuroborreliosis. *Med Pregl.* 1995;48(3-4):120-2.
244. Juchnowicz D, Rudnik I, Czernikiewicz A, Zajkowska J, Pancewicz SA. Mental disorders in the course of Lyme borreliosis and tick-borne encephalitis. *Przegl Epidemiol* 2002;56 Suppl 1:37-50 [Polish]
245. Judy L. Thompson, Nina Urban, Mark Slifstein, Xiaoyan Xu, Lawrence S. Kegeles, Ragy R. Girgis, Yael

Beckerman, Jill M. Harkavy-Friedman, Roberto Gil, Anissa Abi- Dargham. Striatal Dopamine Release in Schizophrenia Comorbid with Substance Dependence *Mol Psychiatry*. 2013 Aug; 18(8): 909–915. doi: 10.1038/mp.2012.109

246. Kaiser B. Neuroborreliosis. *J Neurol*. 1998; 245:247-255
247. Kanjwal K, Karabin B, Kanjwal Y, Grubb BP. Postural orthostatic tachycardia syndrome following Lyme disease. *Cardiol J*. 2011;18(1):63-6.
248. Kaplan A. Neuropsychiatric masquerades. *Psychiatr Times* 2009 Feb; 26(2):1-8.
249. Kaplan RF, Jones-Woodward L, Workman K, Steere AC, Logigian EL, Meadows ME. Neuropsychological deficits in Lyme disease patients with and without other evidence of central nervous system pathology. *Appl Neuropsychol*. 1999;6(1):3-11.
250. Kaplan RF, Jones-Woodward L. Lyme encephalopathy: a neuropsychological perspective. *Semin Neurol*. 1997 Mar;17(1):31-7.
251. Kaplan RF, Meadows ME, Vincent LC, Logigian EL, Steere AC. Memory impairment and depression in patients with Lyme encephalopathy: comparison with fibromyalgia and nonpsychotically depressed patients. *Neurology*. 1992 Jul;42(7):1263-7.
252. Karma A, Stenborg T, Summanen P, Immonen I, Mikkilä H, and Seppälä I. Long-term follow-up of chronic Lyme neuroretinitis. *Retina* 1996; 16: 505-509.
253. Karma A, Pirttilä TA, Viljanen MK, Lähde YE, Raitta CM. Secondary retinitis pigmentosa and cerebral demyelination in Lyme borreliosis. *Br J Ophthalmol*. 1993 Feb;77(2):120-2.
254. Karma A, Seppälä I, Mikkilä H, Kaakkola S, Viljanen M, Tarkkanen A. Diagnosis and clinical characteristics of ocular Lyme borreliosis. *Am J Ophthalmol*. 1995 Feb;119(2):127-35.
255. Karrasch M, Fingerle V, Boden K, Darr A, Baier M, Straube E, Nenadic I. Neuroborreliosis and acute encephalopathy: The use of CXCL13 as a biomarker in CNS manifestations of Lyme borreliosis. *Ticks Tick Borne Dis*. 2018 Feb;9(2):415-417. doi: 10.1016/j.ttbdis.2017.
256. Kaufman DL, Koegnik AM, Mozayeni RB, Cherry NA, Breitschwerdt EB. Neurological and immunological dysfunction in two patients with *Bartonella henselae* bacteremia. *Clin Case Reports* 2017;5:931-935.
257. Keilp JG, Corbera K, Gorlyn M, Oquendo MA, Mann JJ, Fallon BA. Neurocognition in Post-Treatment Lyme Disease and Major Depressive Disorder. *Arch Clin Neuropsychol*. 2018 Nov 12.
258. Keilp JG, Corbera K, Slavov I, Taylor MJ, Sackeim HA, Fallon BA. WAIS-III and WMS-III performance in chronic Lyme disease. *J Int Neuropsychol Soc*. 2006 Jan;12(1):119-29.
259. Keller TL, Halperin JJ, and Whitman M. PCR detection of *Borrelia burgdorferi* DNA in cerebrospinal fluid of Lyme neuroborreliosis patients. *Neurology* 1992; 43: 32- 42.
260. Kennedy PGE. VIRAL ENCEPHALITIS: CAUSES, DIFFERENTIAL DIAGNOSIS, AND MANAGEMENT *Journal of Neurology, Neurosurgery & Psychiatry* 2004;75:i10-i15.
261. Kepa L, Oczko-Grzesik B, Badura-Glombik T. Evaluation of cerebrospinal fluid serotonin (5-HT) concentration in patients with post-Lyme disease syndrome-- preliminary study *Przegl Epidemiol*. 2008;62(4):793-800. Polish.
262. Kinderlehrer DA. Anorexia Nervosa Caused by Polymicrobial Tick-Borne Infections: A Case Study. *Int Med Case Rep J*. 2021;14:279-287 <https://doi.org/10.2147/IMCRJ.S311516>
263. Kinderlehrer D. Does Lyme Disease Cause PANS? *J Biomed Res Environ Sci*. 2021, DOI: 10.37871/jbres1201
264. Kinderlehrer, D.A. Is *Bartonella* a Cause of Primary Sclerosing Cholangitis? A Case Study. *Gastrointest. Disord*. 2020, 2, 48-57. <https://doi.org/10.3390/gidisord2010005>
265. Kinderlehrer DA, Brown N. Microbial Induced Autoimmune Inflammation as a Cause of Mental Illness in Adolescents: A Case Series. *Global Journal of Medical Research*. 2021 21(A1), 1–13. <https://doi.org/10.34257/GJMRAVOL21IS1PG1>

266. Kinderlehrer DA. The Effectiveness of Microdosed Psilocybin in the Treatment of Neuropsychiatric Lyme Disease: A Case Study. *Int Med Case Rep J*. 2023;16:109-115. <https://doi.org/10.2147/IMCRJ.S395342>
267. Kobayashi K, Mizukoshi C, Aoki T, Muramori F, Hayashi M, Miyazu K, Koshino Y, Ohta M, Nakanishi I, Yamaguchi N. *Borrelia burgdorferi*- seropositive chronic encephalomyelopathy: Lyme neuroborreliosis? An autopsied report. *Dement Geriatr Cogn Disord*. 1997 Nov-Dec;8(6):384-90.
268. Kohler J, Kern U, Kasper J, Rhese-Küpper B, Thoden U. Chronic central nervous system involvement in Lyme borreliosis. *Neurology*. 1988 Jun;38(6):863-7.
269. Kohler J. Lyme borreliosis in neurology and psychiatry. *Fortschr Med*. 1990 Apr 10;108(10):191-3, 197. Review. [German]
270. Kollikowski HH, Schwendemann G, Schulz M, Wilhelm H, Lehmann HJ. Chronic borrelia encephalomyeloradiculitis with severe mental disturbance: immunosuppressive versus antibiotic therapy. *J Neurol*. 1988 Jan;235(3):140- 2.
271. Koola MM et al. Undiagnosed Lyme disease in adults with schizophrenia. *Schizophrenia Research*. 2015 Oct;168(1-2):579-80.
272. Krause DL, Norbert Müller N. The relationship between Tourette's syndrome and infections. *Open Neurol J*. 2012; 6: 124-128.
273. Kristensson K. Microbes' roadmap to neurons. *Nat Rev Neurosci*. 2011 Jun;12(6):345-57.
274. Kristoferitsch W. Neurologic manifestations in Lyme borreliosis. 1993, 11(3):393-400.
275. Krüger H, Heim E, Schuknecht B, Scholz S. Acute and chronic neuroborreliosis with and without CNS involvement: a clinical, MRI, and HLA study of 27 cases. *J Neurol*. 1991 Aug;238(5):271-80.
276. Krupp LB, Hyman LG, Grimson R, Coyle PK, Melville P, Ahnn S, Dattwyler R, Chandler B. Study and treatment of post Lyme disease (STOP-LD): a randomized double masked clinical trial. *Neurology*. 2003 Jun 24;60(12):1923-30.
277. Krupp LB, Masur D, Schwartz J, Coyle PK, Langenbach LJ, Fernquist SK, Jandorf L, Halperin JJ. Cognitive functioning in late Lyme borreliosis. *Arch Neurol*. 1991 Nov;48(11):1125-9.
278. Krupp LB, Masur D, Schwartz J, Coyle PK, Langenbach JJ, Fernquist SK. Cognitive functioning in late Lyme borreliosis. *Arch Neurol* 1999; 48: 1125- 1129.
279. Kuhn M, Bransfield RC. Divergent opinions of proper Lyme disease diagnosis and implications for children co-morbid with autism spectrum disorder. *Med Hypotheses*. 2014 Sep;83(3):321-5.
280. Kuhn M, Grave S, Bransfield R, Harris S. Long term antibiotic therapy may be an effective treatment for children co-morbid with Lyme disease and autism spectrum disorder. *Med Hypotheses*. 2012 May;78(5):606-15.
281. Lambert JS. An Overview of Tickborne Infections in Pregnancy and Outcomes in the Newborn: The Need for Prospective Studies. *Front Med (Lausanne)*. 2020 Mar 6;7:72. doi: 10.3389/fmed.2020.00072.
282. Lantos PM, Maggi RG, Ferguson B, Varkey J, Park LP, Breitschwerdt EB, Woods CW. Detection of Bartonella species in the blood of veterinarians and veterinary technicians: a newly recognized occupational hazard? *Vector Borne Zoonotic Dis*. 2014 Aug;14(8):563-70. doi: 10.1089/vbz.2013.1512.
283. Lapenta J. Lapenta JM. Lyme Disease and Dementia, Alzheimer, Parkinson, Autism, an Easy Way to Destroy your Brain. *Investigative Dermatology and Venereology Research*. 2018;(1):30-43.[https://www.ommegaonline.org/article- details/Lyme-disease-and-dementia,-Alzheimer,-Parkinson,-Autism,-an-easy-way- to-destroy-your-brain./1992?fbclid=IwAR0Y3i-H7k\\_-Rc4CYHZH8vTHiPvRm3H\\_50JACRWGoqNI\\_cGhQ3greuEv1Og#.XFT1ZLNXL mM.linkedin](https://www.ommegaonline.org/article- details/Lyme-disease-and-dementia,-Alzheimer,-Parkinson,-Autism,-an-easy-way- to-destroy-your-brain./1992?fbclid=IwAR0Y3i-H7k_-Rc4CYHZH8vTHiPvRm3H_50JACRWGoqNI_cGhQ3greuEv1Og#.XFT1ZLNXL mM.linkedin)
284. Lanz, J.; Biniyas-Harris, N.; Kuvaldina, M.; Jain, S.; Lewis, K.; Fallon, B.A. Disulfiram: Mechanisms, Applications, and Challenges. *Antibiotics* **2023**, *12*, 524. <https://doi.org/10.3390/antibiotics12030524>
285. Lashnits E, Maggi R, Jarskog F, Bradley J, Breitschwerdt E, Frohlich F. Schizophrenia and Bartonella

- spp. Infection: A Pilot Case-Control Study. *Vector Borne Zoonotic Dis.* 2021 Jun;21(6):413-421. doi: 10.1089/vbz.2020.2729.
286. Latov N, Wu AT, Chin RL, Sander HW, Alaedini A, Brannagran TH. Neuropathy and cognitive impairment following vaccination with the OspA protein of *Borrelia burgdorferi*. *J Peripher Nerv Syst* 2004; 9: 165-167.
  287. Lawrence C, Lipton RB, Lowy RD, Coyle PK. Seronegative chronic relapsing neuroborreliosis. *Eur Neurol* 1995; 35(2): 113-117.
  288. Leavey K, MacKenzie RK, Faber S, Lloyd VK, Mao C, Wills MKB, Boucoiran I, Cates EC, Omar A, Marquez O, Darling EK. Lyme borreliosis in pregnancy and associations with parent and offspring health outcomes: An international cross- sectional survey. *Front Med (Lausanne)*. 2022 Nov 3;9:1022766. doi: 10.3389/fmed.2022.1022766.
  289. Lee SH. Lyme disease caused by *Borrelia burgdorferi* with two homeologous 16S rRNA genes: a case report. *Int Med Case Rep J.* 2016 Apr 21;9:101-6. doi: 10.2147/IMCRJ.S99936.
  290. Leedy MJ, Jackson M, Callahan JL. Treating depression and compensatory narcissistic personality style in a man with chronic Lyme disease. *Clinical Case Studies.* 2007 Oct; 6(5):430-42.
  291. Legatowicz-Koprowska M, Gziut AI, Walczak E, Gil RJ, Wagner T. Borreliosis--simultaneous Lyme carditis and psychiatric disorders--case report. *Pol Merkur Lekarski.* 2008 May;24(143):433-5. Polish.
  205. Lennon JC. Etiopathogenesis of Suicide: A Conceptual Analysis of Risk and Prevention Within a Comprehensive, Deterministic Model. *Front Psychol.* 2019 Sep 12;10:2087. doi: 10.3389/fpsyg.2019.02087.
  292. Leonard L, Swedo SE, Garvey M et al. Postinfectious and Other Forms Obsessive Compulsive Disorder. *Child and Adolescent Psychiatric Clinics of North America.* 1999 8(3):497-511. [https://doi.org/10.1016/S1056-4993\(18\)30166-4](https://doi.org/10.1016/S1056-4993(18)30166-4)
  293. Leslie TA, Levell NJ, Cutler SJ, Cann KJ, Smith ME, Wright DJ, Gilkes JJ, Robinson TW. Acrodermatitis chronica atrophicans: a case report and review of the literature. *Br J Dermatol.* 1994 Nov;131(5):687-93.
  294. Levenson JL Psychiatric issues in infectious diseases. *Primary Psychiatry* 2006;13(5):29-32.
  295. Liegner KB, Duray P, Agricola M, Rosenkilde C, Yannuzzi LA, Ziska M, Tilton RC, Hulinska D, Hubbard J, Fallon BA. Lyme disease and the clinical spectrum of antibiotic responsive chronic meningoencephalomyelitides. *J Spiro Tick-Borne Dis* 1997; 4: 61-73.
  296. Lino AMM, Spera RR, de Campos FPF, et al. Adult-onset opsoclonus-myoclonus- ataxia syndrome as a manifestation of Brazilian lyme disease-like syndrome: a case report and review of literature. *Autops Case Rep.* 2014;4(1):29–37. Published 2014 Mar 31. doi:10.4322/acr.2014.005
  297. Listernick R. A 17-year-old boy previously diagnosed with chronic Lyme disease. Patient complained of low-grade fevers, headaches, pharyngitis, and suspected his mother was trying to poison him. *Pediatr Ann.* 2004 Aug;33(8):494-8.
  298. Livengood JA and Gilmore RD, Jr. Invasion of human neuronal and glial cells by an infectious strain of *Borrelia burgdorferi*. *Microbes and Infection.* 2006; 8: 2832-2840.
  299. Lobraico J, Butler A, Petrini J, Ahmadi R. New insights into stages of lyme disease symptoms from a novel hospital-based registry. *J Prim Care Community Health.* 2014 Oct;5(4):284-7.
  300. Locke, S., O'Bryan, J., Zubair, A. S., Rethana, M., Moffarah, A., Krause, P. J Farhadian, S. F. (2023). Neurologic Complications of Babesiosis, United States, 2011–2021. *Emerging Infectious Diseases*, 29(6), 1128-1135. <https://doi.org/10.3201/eid2906.221890>.
  301. Logigian EL, Johnson KA, Kijewski MF, Kaplan RF, Becker JA, Jones KJ, Garada BM, Holman BL, Steere AC. Reversible cerebral hypoperfusion in Lyme encephalopathy. *Neurology* 1997 Dec;49(6):1661-70.
  302. Logigian EL, Kaplan RF, Steere AC Chronic neurologic manifestations of Lyme disease. *N Engl J*



Med. 1990 Nov 22;323(21):1438-44.

303. Logigian EL, Kaplan RF, Steere AC. Successful treatment of Lyme encephalopathy with intravenous ceftriaxone. *J Infect Dis.* 1999 Aug;180(2):377-83.
304. Lucker JR (2015) Auditory Hypersensitivity in Children with Lyme Disease. *Ann Pediatr Child Health* 3(1): 1035
305. Luft BJ, Steinman CR, Neimark HC, Muralidhar B, Rush T, Finkel MF, Kundel M, Dattwyler RJ. Invasion of the CNS by *Borrelia burgdorferi* in acute disseminated infection. *JAMA* 1992; 267: 1364-1367.
306. Maes M, Berk M, Goehler L, Song C et al. Depression and sickness behavior are Janus-faced responses to shared inflammatory pathways. *BMC Med.* 2012; 10: 66. doi: 10.1186/1741-7015-10-66.
307. Madhi DK, Issa AH, Al-Luaibi Y, Al-Maliki QN. First report of *Borrelia* spp. and *Borrelia* spp. in blood, urine, and buccal cavity of patients with psychiatric disorder in Basra Province, Iraq. *Drug Invention Today.* 2019, 11(11):2927-2932
308. Maggi RG, Ericson M, Mascarelli PE, Bradley JM, Breitschwerdt EB. *Bartonella henselae* bacteremia in a mother and son exposed to ticks in the Netherlands. *Parasites and Vectors* 6:101, 2013.
309. Maggi RG, Mascarelli PE, Havenga LN, NAidoo V, Breitschwerdt EB. Co-infection with *Anaplasma platys*, *Bartonella henselae* and *Candidatus Mycoplasma hematonparvum* in a veterinarian. *Parasites and Vectors* 6:106, 2013.
310. Maggi RG, Mozayeni BR, Pultorak EL, Hegarty BC, Bradley JM, Correa M, Breitschwerdt EB. *Bartonella* spp. bacteremia and rheumatic symptoms in patients from Lyme Disease-endemic region. *Emerg Infect Dis* 2012;18:783-791.
311. Maillefert JF, Dardel P, Piroth C, Tavernier C. Mental nerve neuropathy in Lyme disease. *Rev Rhum Engl Ed.* 1997 Dec;64(12):855.
312. Maimone D, Villanova M, Stanta G, Bonin S, Malandrini A, Guazzi GC, Annunziata P. Detection of *Borrelia burgdorferi* DNA and complement membrane attack complex deposits in the sural nerve of a patient with chronic polyneuropathy and tertiary Lyme disease. *Muscle Nerve.* 1997 Aug;20(8):969-75.
313. Markeljević J, Sarac H, Rados M. Tremor, seizures and psychosis as presenting symptoms in a patient with chronic Lyme neuroborreliosis (LNB). *Coll Antropol.* 2011 Jan;35 Suppl 1:313-8.
314. Maluki A, Breitschwerdt E, Bemis L, Greenberg R, Mozayeni BR, Dencklau J, Erikson M. Imaging analysis of *Bartonella* species in the skin using single-photon and multi-photon (second harmonic generation) laser scanning microscopy. *Clin Case Rep.* 2020 Jul 19;8(8):1564-1570. doi: 10.1002/ccr3.2939. July 2020
315. Marvel CL, Alm KH, Bhattacharya D, Rebman AW, Bakker A, Morgan OP, Creighton JA, Kozero EA, Venkatesan A, Nadkarni PA, Aucott JN. A multimodal neuroimaging study of brain abnormalities and clinical correlates in post treatment Lyme disease. *PLoS One.* 2022 Oct 26;17(10):e0271425. doi: 10.1371/journal.pone.0271425.
316. Mascarelli PE, Maggi RG, Hopkins S, Mozayeni BR, Trull CL, Bradley JM, Hegarty BC, Breitschwerdt EB *Bartonella henselae* infection in a family experiencing neurological and neurocognitive abnormalities after woodlouse hunter spider bites *Parasites Vectors* 2013; 6:98.
317. Matera G, Labate A, Quirino A, Lamberti AG, Borzà G, Barreca GS, Mumoli L, Peronace C, Giancotti A, Gambardella A, Foca A, Quattrone A. Chronic neuroborreliosis by *B. garinii*: an unusual case presenting with epilepsy and multifocal brain MRI lesions. *New Microbiol.* 2014 Jul;37(3):393-7
318. Matson JL, Rachel L. Goldin. Comorbidity and autism: Trends, topics and future directions. *Research in Autism Spectrum Disorders*, Volume 7, Issue 10, 2013, Pages 1228-1233, ISSN 1750-9467, <https://doi.org/10.1016/j.rasd.2013.07.003>.
319. Mattingley DW, Koola MM. Association of Lyme Disease and Schizoaffective Disorder, Bipolar

- Type: Is it Inflammation Mediated? *Indian J Psychol Med.* 2015;37(2):243–246. doi:10.4103/0253-7176.
320. Mattsson N, Bremell D, Anckarsater R, Blennow K, Anckarsater H, Zetterberg H, Hagberg L. Neuroinflammation in Lyme neuroborreliosis affects amyloid metabolism. *BMC Neurol.* 2010 Jun 22;10(1):51
  321. Maxwell, S.P.; Brooks, C.; McNeely, C.L.; Thomas, K.C. Neurological Pain, Psychological Symptoms, and Diagnostic Struggles among Patients with Tick- Borne Diseases. *Healthcare* **2022**, *10*, 1178. <https://doi.org/10.3390/healthcare10071178>
  322. McAuliffe P, Brassard MR, Fallon B. Memory and executive functions in adolescents with posttreatment Lyme disease. *Applied Neuropsych.* 2008; 15:208- 219.
  323. McCormick DW, Brown CM, Bjork, J, Cervantes K, Esponda-Morrison B, Garrett J, Kwit N, Mathewson A, McGinnis C, Notarangelo M, Osborn R, Schiffman E, Sohail H, Schwartz AM, Hinckley AF, Kugeler KJ. Characteristics of Hard Tick Relapsing Fever Caused by *Borrelia miyamotoi*, United States, 2013–2019. Medscape. 8-18-23. Characteristics of Hard Tick Relapsing Fever Caused by *Borrelia miyamotoi*, United States, 2013–2019 ([medscape.org](https://www.medscape.org))
  324. Melis K, Bochner A, Vandenbergh P, Janssens G. Cat-scratch disease with reversible encephalopathy. *Eur J Pediatr.* 1989 Oct;149(1):24-5. doi: 10.1007/BF02024328.
  325. Merlo A, Weder B, Ketz E, Matter L. Locked-in state in *Borrelia burgdorferi* meningitis. *J Neurol.* 1989;236:305-306.
  326. Mervine P. Chronic lyme disease: psychogenic fantasy or somatic infection? *Environ Health Perspect.* 2003;111(2):A76–A77. doi:10.1289/ehp.111-a76
  327. Middelveen MJ, Stricker RS. Filament formation associated with spirochetal infection: a comparative approach to Morgellons disease. *Clin Cosmet Investig Dermatol.* 2011; 4: 167–177. Published online 2011 Nov 14. doi: 10.2147/CCID.S26183
  328. Middelveen MJ, Fesler MC, Stricker RB. History of Morgellons disease: from delusion to definition. *Clin Cosmet Investig Dermatol.* 2018; 11: 71–90. doi: 10.2147/CCID.S152343
  329. Mironova, M et al. Lyme neuroborreliosis-associated cerebrovascular events in the Finnish endemic area. *Journal of the Neurological Sciences*, Volume 0, Issue 0, 117544
  330. Mikkilä H, Seppälä I, Leirisalo-Repo M, Immonen I, Karma A. The etiology of uveitis: the role of infections with special reference to Lyme borreliosis. *Acta Ophthalmol Scand.* 1997 Dec;75(6):716-9.
  331. Mikkilä HO, Seppälä IJ, Viljanen MK, Peltomaa MP, Karma A. The expanding clinical spectrum of ocular Lyme borreliosis. *Ophthalmology.* 2000 Mar;107(3):581-7.
  332. Miklossy J, Donta S, Mueller K, Nolte O, Perry G. Chronic or late Lyme neuroborreliosis: Present and future. *Open Neurology J.* 2012; 6:78.
  333. Millner M. Neurologic manifestations of Lyme borreliosis in children. *Wien Med Wochenschr* 1995; 145 (7-8): 178-182.
  334. Möhrenschrager M, Köhn FM, Bauer M, Schaaf L, Hofmann H, Ring J. Late Lyme disease masking a non-functioning adenoma of the anterior lobe of the pituitary gland. *Andrologia.* 2002 Jun;34(3):162-3.
  335. Mokry M, Flaschka G, Kleinert G, Kleinert R, Fazekas F, Kopp W. Chronic Lyme disease with an expansive granulomatous lesion in the cerebellopontine angle. *Neurosurgery.* 1990 Sep;27(3):446-51.
  336. Montplaisir J, de Champlain J, Young SN, Missala K, Sourkes TL, Walsh J, Rémillard G. Narcolepsy and idiopathic hypersomnia. *Neurology* Nov 1982, 32 (11) 1299; DOI: 10.1212/WNL.32.11.1299
  337. Morgen K, Martin R, Stone RD, Grafman J, Kadom N, McFarland HF, Marques FLAIR and magnetization transfer imaging of patients with post-treatment Lyme disease syndrome. *Neurology.*

2001 Dec 11;57(11):1980-5.

338. Morgenstern RG. Chronic Lyme disease: it's not all in our heads. *Environ Health Perspect.* 2003;111(2):A77. doi:10.1289/ehp.111-a77a
339. Morris G, Berk M, Walder K, Maes M. The putative role of viruses, bacteria, and chronic fungal biotoxin exposure in the genesis of intractable fatigue accompanied by cognitive and physical disability. *Mol Neurobiol.* 2016 May;53(4):2550-71.
340. Moses JM, RS Riseberg, and JM Mansbach. Lyme disease presenting with persistent headache. *Pediatrics* 2003; 112: 477-449.
341. Muller M, Retzl J, Plank E, Scholz H, Ziervogel H, Stanek G. Prevalence of *Borrelia burgdorferi* serum antibodies in 651 patients with predominantly neurologic diseases. *Wien Klin Wochenschr.* 1993;105(21):599-602.
342. Muller N, Riedel M, Straube A, Gunther W, Wilske B. Increased anti-streptococcal antibodies in patients with Tourette's syndrome. *Psychiatry Res.* 2000 Apr 24;94(1):43-9.
343. Munir A, Aadil M, Rehan Khan A. Suicidal and homicidal tendencies after Lyme disease: an ignored problem. *Neuropsychiatr Dis Treat.* 2017 Aug 2;13:2069-2071. doi: 10.2147/NDT.S145359. PMID: 28814875; PMCID: PMC5546819.
344. Murray, L.; Alexander, C.; Bennett, C.; Kuvaldina, M.; Khalsa, G.; Fallon, B. Kundalini Yoga for Post-Treatment Lyme Disease: A Preliminary Randomized Study. *Healthcare* **2022**, *10*, 1314. <https://doi.org/10.3390/healthcare10071314>
345. Murray R, Morawetz R, Kepes J, el Gammal T, LeDoux M. Lyme neuroborreliosis manifesting as an intracranial mass lesion. *Neurosurgery.* 1992 May;30(5):769-73.
346. Mustafiz F, Moeller J, Kuvaldina M, Bennett C, Fallon BA. Persistent Symptoms, Lyme Disease, and Prior Trauma. *J Nerv Ment Dis.* 2022 May 1;210(5):359-364. doi: 10.1097/NMD.0000000000001452.
347. Nachman SA, Pontrelli L. Central nervous system Lyme disease. *Seminars in Pediatric Infectious Diseases.* 2003, 14(2):123-30. <https://doi.org/10.1053/spid.2003.127229>.
348. Nagy EE, Rácz A, Urbán E, Terhes G, Berki T, Horváth E, Georgescu AM, Zaharia-Kézdi IE. Diagnostic pitfalls in a young Romanian ranger with an acute psychotic episode. *Neuropsychiatr Dis Treat.* 2016 May 3;12:961-7. doi: 10.2147/NDT.S103300.
349. Matthew J. Navarro, Frederic Karim, Rakan Al-Ghanamah, et al. Mental Status Changes in Severe Babesiosis. *AIM Clinical Cases.*2023;2:e221096. [Epub 16 May 2023]. doi:10.7326/aimcc.2022.1096
350. Neumärker KJ, Dudeck U, Plaza P. Borrelien-Enzephalitis und Katatonie im Jugendalter [Borrelia encephalitis and catatonia in adolescence].
351. Nervenarzt. 1989 Feb;60(2):115-9. German. PMID: 2716930. Newberg A, Hassan A, Alavi A. Cerebral metabolic changes associated with Lyme disease *Nucl Med Commun* 2002 August;23(8):773-777
352. Nicolson GL Chronic bacterial and viral Infections in neurodegenerative and neurobehavioral diseases. *Lab Medicine.* 2008;39(5):291-9.
353. Nicolson GL, Haier J. Role of chronic bacterial and viral infections in neurodegenerative, neurobehavioral, psychiatric, autoimmune and fatiguing illnesses. *Br J Med Pract.* 2009;2(4)20-8.
354. Nields JA, Fallon BA, Jastreboff PJ. Carbamazepine in the treatment of Lyme disease-induced hyperacusis. *J Neuropsychiatry Clin Neurosci* 1999 Winter;11(1):97-9
355. Nields JA, Fallon BA. Differential diagnosis and treatment of Lyme disease with special reference to psychiatric practice. *Directions Psychiatry,* 1998; 18: 209-228.
356. Nields JA, Kueton JF. Tullio phenomenon and seronegative Lyme borreliosis. *Lancet.* 1991 Jul 13;338:128-9 .
357. Nocton JJ, Bloom BJ, Rutledge BJ, Persing DJ, Logigian EL, Schmid CH, Steere AC. Detection of *Borrelia burgdorferi* DNA by polymerase chain reaction in cerebrospinal fluid in Lyme neuroborreliosis. *J. Infect Dis* 1996; 174: 623-627.

358. Oczko-Grzesik B, Kępa L, Puszcz-Matlińska M, Pudło R, Żurek A, Badura- Głębik T. Estimation of cognitive and affective disorders occurrence in patients with Lyme borreliosis. *Ann Agric Environ Med*. 2017 Mar 1;24(1):33-38.
359. Offutt Amy, Breitschwerdt Edward B. Case report: Substantial improvement of autism spectrum disorder in a child with learning disabilities in conjunction with treatment for poly-microbial vector borne infections. *Frontiers in Psychiatry*. 2023, 14. DOI=10.3389/fpsy.2023.1205545. <https://www.frontiersin.org/articles/10.3389/fpsy.2023.1205545>.
360. Oglodek E, Mos D, Araszkievicz A. Coexisting of borreliosis, depression and psoriasis--case report. *Pol Merkur Lekarski*. 2010 Jan;28(163):53-5.
361. Oksi J, Kalimo H, Marttila RJ, Marjaniemi M, Sonninen P, Nikoskelainen J, Viljanen MK. Inflammatory brain changes in Lyme Borreliosis. A report on three patients and review of literature. *Brain*. 1996 Dec; 119 (Pt 6) : 2143-2154
362. Omasits M, Seiser A, Brainin M. Recurrent and relapsing course of borreliosis of the nervous system. *Wien Klin Wochenschr*. 1990 Jan 5;102(1):4-12. Review.
363. Pachner AR. Early disseminated Lyme disease: Lyme meningitis. *Am J Med*. 1995; 98(4A):30S-37S
364. Pachner AR. *Borrelia burgdorferi* in the nervous system: the new "great imitator". *Ann N Y Acad Sci*. 1988;539:56-64.
365. Pachner AR, Duray P, Steere AC. Central nervous system manifestations of Lyme disease. *Arch Neurol*. 1989 Jul;46(7):790-5.
366. Pachner AR, Steiner I. Lyme neuroborreliosis: infection, immunity and inflammation. *Lancet Neurol* 2007; 6:544- 52.
367. Pachner AR. Neurologic manifestations of Lyme disease, the new "great imitator". *Rev Infect Dis*. 1989 Sep-Oct;11 (Suppl 6):S1482-6.
368. Pachner AR. Spirochetal diseases of the CNS. *Neurol Clin*. 1986 Feb;4(1):207-22.
369. Paparone PW. Neuropsychiatric manifestations of Lyme disease. *J Am Osteopath Assoc* 1998 Jul;98(7):373-8
370. Pasareanu AR, Mygland Å, Kristensen Ø. A woman in her 50s with manic psychosis. *Tidsskr Nor Laegeforen*. 2012 Mar 6;132(5):537-9. English, Norwegian. doi: 10.4045/tidsskr.11.0683. PMID: 22398772.
371. Pasareanu AR, Mygland Å, Kristensen Ø. A woman in her 50s with manic psychosis. *Tidsskr Nor Laegeforen*. 2012 Mar 6;132(5):537-9.
372. Paterson RW, Takada LT, Geschwind MD. Diagnosis and treatment of rapidly progressive dementias. *Neurol Clin Pract*. 2012 Sep; 2(3): 187–200. doi: 10.1212/CPJ.0b013e31826b2ae8
373. Petrovic M, Vogelaers D, Van Renterghem L, De Reuck J, Afschrift M. Lyme borreliosis - A review of the late stages and treatment of four cases. *Acta Clinica Belgica* 1998;53-3:178-183.
374. Pfister HW, Preac-Mursic V, Wilske B, Rieder G, Forderreuther S, Schmidt S, Kapfhammer HP. Catatonic syndrome in acute severe encephalitis due to *Borrelia burgdorferi* infection. *Neurology*. 1993 Feb;43(2):433-5.
375. Pfister HW, Tobias A, Rupprecht TA. Clinical aspects of neuroborreliosis and post- Lyme disease syndrome in adult patients. *International Journal of Medical Microbiology*. 2006 296(1):11-16 <https://doi.org/10.1016/j.ijmm.2005.12.003>
376. Plutchok JJ, Tikofsky RS, Liegner K, Kochevar JM, Fallon BA, Van Heertum RL. Tc-99m HMPAO Brain SPECT imaging in chronic Lyme disease. *J Spiro Tick- borne Dis* 1999; 6: 117-122.
377. Plutchok JJ, Tikofsky RS, Liegner KB, Fallon BA, Van Heertum RL. Brain SPECT imaging in chronic Lyme disease. *J Spiro Tick Borne-Dis*. 1999; 6: 10- 16.

378. Pollina DA, Elkins LE, Squires NK, Scheffer SR, Krupp LB. Does process- specific slowing account for cognitive deficits in Lyme disease? *Appl Neuropsychol*. 1999;6(1):27-32.
379. Pollina DA, Sliwinski M, Squires NK, Krupp LB. Cognitive processing speed in Lyme disease. *Neuropsychiatry Neuropsychol Behav Neurol*. 1999 Jan;12(1):72-8.
380. Poplawska R, Konarzewska B, Gudel-Trochimowicz I, Szulc A. Psychologic disorders in acute and persistent neuroborreliosis. *Pol Merkuriusz Lek* 2001 Jan;10(55):36-7
381. Poplawska R, Szulc A, Zajkowska J, Pancewicz S. Neuroborreliosis: a psychiatric problem? *Psychiatr Pol* 1999 Mar- Apr;33(2):241-50.
382. Preac-Mursic V, Wilske B, Schierz G, et al. Repeated isolation of spirochetes from the cerebrospinal fluid of a patient with meningoradiculitis (Bannwarth syndrome). *Eur J Clin Microbiol* 1984; 3: 564-565.
383. Primavera A, Gazzola P, De Maria AF. Neuropsychological deficits in neuroborreliosis. *Neurology*. 1999 Sep 11;53(4):895-6.
384. Puri BK, Shah M, Julu PO, Kingston MC, Monro JA. The association of lyme disease with loss of sexual libido and the role of urinary bladder detrusor dysfunction. *Int Neurourol J*. 2014 Jun;18(2):95-7.
385. Puri BK et al. The effect of artesunate on short-term memory in Lyme borreliosis. *Medical Hypotheses* 2017.
386. Putnam FW. Child Development and Dissociation. *Child and Adolescent Psychiatric Clinics of North America*. 1996 5(2):285-302. [https://doi.org/10.1016/S1056-4993\(18\)30367-5](https://doi.org/10.1016/S1056-4993(18)30367-5)
387. Quinn SJ, Boucher BJ, Booth JB. Reversible sensorineural hearing loss in Lyme disease. *J Laryngol Otol*. 1997 Jun;111(6):562-4.
388. Ragnaud JM, Morlat P, Buisson M, Ferrer X, Orgogozo JM, Julien J, Beylot J, Aubertin J. Neurologic manifestations of Lyme disease. Apropos of 25 cases. *Rev Med Interne*. 1995;16(7):487-94.
389. Ramanan SV. Loss of the sense of humor. *Arch Intern Med* 2000 Sep 11;160(16):2546 .
390. Ramesh G, Alvarez AL, Roberts ED, Dennis VA, Lasater BL, Alvarez X et al. Pathogenesis of Lyme neuroborreliosis: *Borrelia burgdorferi* lipoproteins induce both proliferation and apoptosis in rhesus monkey astrocytes. *Eur. J. Immunol*. 2003; 33(9): 2539–2550
391. Ramesh G, Bengt S, Pahar B, Philipp MT. A possible role for inflammation in mediating apoptosis of oligodendrocytes as induced by the Lyme disease spirochete *Borrelia burgdorferi*. *J Neuroinflammation*. 2012; 9: 72. doi: 10.1186/1742-2094-9-72
392. Ramesh G, Didier PJ, England JD, et al. Inflammation in the pathogenesis of Lyme neuroborreliosis. *Am J Pathol*. 2015 May;185(5):1344-60.
393. Ramesh R, Borda JT, Dufor J, Kaushal D, Ramamoorthy R, Lackner AA, Philipp MT. Interaction of the Lyme disease spirochete *Borrelia burgdorferi* with brain parenchyma elicits inflammatory mediators from glial cells as well as glial and neuronal apoptosis. *Am J Pathol*. 2008; 173:1415-27<sup>[1]</sup><sub>SEP</sub>.
394. Ramesh G, Santana-Gould L, Inglis FM, England JD, Philipp MT. The Lyme disease spirochete *Borrelia burgdorferi* induces inflammation and apoptosis in cells from dorsal root ganglia. *J Neuroinflammation*. 2013;10:88. Published 2013 Jul 18. doi:10.1186/1742-2094-10-88
395. Ratnasamy N, Everett ED, Roland WE, McDonald G, Caldwell CW. Central nervous system manifestations of human ehrlichiosis. *Clin Infect Dis* 1996 Aug;23(2):314-9
396. Ravdin LD , Hilton E , Primeau M , Clements C , Barr WB Memory functioning in Lyme borreliosis. *The Journal of Clinical Psychiatry* [01 Jul 1996, 57(7):282-286]
397. Rebman AW et al. The clinical symptoms and quality-of-life characterization of a well-defined group of patients with posttreatment Lyme disease syndrome. *Front Med (Lausanne)* 2017 14:224.
398. Reess J, Mauch E, Kornhuber HH. Subakutes organisches Psychosyndrom als klinische Manifestation einer Infektion mit *Borrelia burgdorferi* im Stadium II ohne weitere neurologische Störungen [Subacute organic psychosyndrom as a clinical manifestation of infection with stage II *Borrelia burgdorferi*

- without further neurologic manifestations]. *Nervenarzt*. 1991 Aug;62(8):514-5. German. PMID: 1944717.
399. Reddy KP, McCannon JB, Venna N. Diaphragm paralysis in Lyme disease: late occurrence in the course of treatment and long-term recovery. *Ann Am Thorac Soc*. 2015 Apr;12(4):618-20.
  400. Reik L, Smith L, Khan A, Nelson W. Demyelinating encephalopathy in Lyme disease. *Neurology* Feb 1985, 35 (2) 267; DOI: 10.1212/WNL.35.2.267
  401. Reik L, Steere AC, Bartenhagen NH, Shope RE, Malawista SE. Neurologic abnormalities of Lyme disease. *Medicine (Baltimore)*. 1979 Jul;58(4):281-94.
  402. Rhee H, Cameron DJ. Lyme disease and pediatric autoimmune neuropsychiatric disorders associated with streptococcal infections (PANDAS): an overview. *Int J Gen Med*. 2012;5: 163-174.
  403. Riedel M, Straube A, Schwarz MJ, Wilske B, Muller N. Lyme disease presenting as Tourette's syndrome. *Lancet*. 1998 Feb 7;351(9100):418-9
  404. Roche Lanquetot R, Ader F, Durand MC, Carlier R, Defferriere H, Dinh A, Herrmann JL, Guillemot D, Perronne C, Salomon J. Results of a prospective standardized study of 30 patients with chronic neurological and cognitive disorders after tick bites. *Med Mal Infect*. 2008 Oct;38(10):543-8.
  405. Roelcke U, Barnett W, Wilder-Smith E, Sigmund D, Hacke W. Untreated neuroborreliosis: Bannwarth's syndrome evolving into acute schizophrenia- like psychosis. A case report. *J Neurol*. 1992 Mar;239(3):129-31
  406. Román GC Sachdev P, Royall DR, Bullock RA et al. Vascular cognitive disorder: a new diagnostic category updating vascular cognitive impairment and vascular dementia. *Journal of the Neurological Sciences*. 2004 226(1- 2):81-7.
  407. Rothaus C. A Girl with Seizures SOURCE: NEJM. May 22nd, 2015  
<http://blogs.nejm.org/now/index.php/a-girl-with-seizures/2015/05/22/comment- page- 1/#comment-225701>
  408. Rudnik I, Konarzewska B, Zajkowska J, Juchnowicz D, Markowski T, Pancewicz SA. The organic disorders in the course of Lyme disease. *Pol Merkuriusz Lek*. 2004 Apr;16(94):328-31
  409. Rudnik I, Poplawska R, Zajkowska J, Konarzewska B, Juchnowicz D, Pancewicz SA. Mental problems in Lyme disease. *Pol Merkuriusz Lek*. 2003 Aug;15(86):161-4
  410. Rudnik-Szalaj I, Poplawska R, Zajkowska J, Szulc A, Pancewicz SA, Gudel I. Mental disorders in Lyme disease. *Pol Merkuriusz Lek*. 2001 Nov;11(65):460- 2.
  411. Rundell JR, Wise MG. Neurosyphilis: a psychiatric perspective. *Psychosomatics*. 1985; 26: 287-295.
  412. Samuel B, Axelband J, Mckim K, Leh D. *Borrelia burgdorferi*: A clinical chameleon. *Consultant*. 2015;55(7):530-535.
  413. Sanders K, Rogers JD. Lyme encephalopathy. *Neurology*. 1991 Jun;41(6):952- 3.
  414. Savely VR, Stricker RB. Morgellons disease: Analysis of a population with clinically confirmed microscopic subcutaneous fibers of unknown etiology. *Clin Cosmet Investig Dermatol*. 2010; 3: 67–78.
  415. Savely VR. Update on Lyme disease: the hidden epidemic. *J Infus Nurs*. 2008 Jul- Aug;31(4):236-40.
  416. Sayad B, Babazadeh A, Barary M, Hosseinzadeh R, Ebrahimpour S, Zeinab Mohseni Afshar ZM. Lyme Neuroborreliosis: A case report. *Authorea*. April 17, 2023. In review. DOI: 10.22541/au.168171907.70401066/v1
  417. Schaller JL, Burkland GA, Langhoff PJ. Do bartonella infections cause agitation, panic disorder, and treatment-resistant depression? *MedGenMed*. 2007 Sep 13;9(3):54.
  418. Scerpella TA, Engber WD. Chronic Lyme disease arthritis: review of the literature and report of a case of wrist arthritis. *J Hand Surg Am*. 1992 May;17(3):571-5.
  419. Scheffer RE, Linden S. Concurrent medical co
  420. nditions with pediatric bipolar disorder. *Curr Opin Psychiatry*. 2007 Jul;20(4):398-401. Review.

421. Schmidt H, Djukic M, Jung K, Holzgraefe M, Dechent P, von Steinbüchel N, Blocher J, Eiffert H, Schmidt-Samoa C. Neurocognitive functions and brain atrophy after proven neuroborreliosis: a case-control study. *BMC Neurol* [2015]
422. Schneider RK, Robinson MJ, Levenson JL Psychiatric presentations of non-HIV infectious diseases. *Psychiatr Clin North Am* 2002 Mar;25(1):1-16
423. Schmutzhard E, Pfausler B, Gasse T, Hittmair-Delazer M, Benke T. Verlaufsformen und Folgezustände bei chronischer Neuroborreliose [Follow-up and sequelae in chronic neuroborreliosis]. *Wien Med Wochenschr.* 1995;145(7-8):183-6. German. PMID: 7610669.
424. Schoof J, Kluge C, Heinze HJ, Galazky I. Startle myoclonus induced by Lyme neuroborreliosis: a case report. *J Med Case Rep* 2013(May); 7(1): 124. DOI: 10.1186/1752-1947-7-124
425. Schuler PA. Gifted Students and Lyme Disease: What Educators, Counselors, and Parents Need to Know. *Gifted Child Today* 2013 36: 35. DOI:10.1177/1076217512465288
426. Scott, J.D. Presentation of Acrodermatitis Chronica Atrophicans Rashes on Lyme Disease Patients in Canada. *Healthcare* 2020, 8, 157. <https://doi.org/10.3390/healthcare8020157> Seltzer EG, Gerber MA, Cartter ML, Freudigman K, Shapiro ED. Long-term Outcomes of Persons with Lyme Disease. *JAMA.* 2000;283(5):609–616. doi:10.1001/jama.283.5.609
427. Shadick NA, Phillips CB, Logigian EL, Steere AC, Kaplan RF, Berardi VP, Duray PH, Larson MG, Wright EA, Ginsburg KS, Katz JN, Liang MH. The long-term clinical outcomes of Lyme disease. A population-based retrospective cohort study. *Ann Intern Med.* 1994 Oct 15;121(8):560-7.
428. Shamim A, Shamim S; Liss G; Nylen E; Pincus J; Yepes M. Constipation Heraldng Neuroborreliosis *Arch Neurol.* 2005;62:671-673.
429. Sherr VT. "Bell's Palsy of the Gut" and Other GI Manifestations of Lyme and Associated Diseases A SPECIAL ARTICLE. *Practical Gastroenterology.* 2006/04/01 30.
430. Sherr VT. Human babesiosis--an unrecorded reality. *Med Hypotheses.* 2004;63(4):609-15
431. Sherr VT. Munchausen's syndrome by proxy and Lyme disease: medical misogyny or diagnostic mystery? *Med Hypotheses.* 2005;65(3):440-7.
432. Sherr VT. Panic attacks may reveal previously unsuspected chronic disseminated Lyme disease. *J Psychiatr Pract.* 2000 Nov;6(6):352-6.
433. Shimasaki, Craig , Frye, Richard E., Trifiletti, Rosario ,Cooperstock, Michael, Kaplan, Gary, Melamed, Isaac, Greenberg, Rosalie, Katz, Amiram , Fier, Eric, Kem, David, Traver, David, Demsey, Tania, Latimer, M Elizabeth, Cross, Amy, Dunn, Joshua P, Bentley, Rebecca, Alvarez, Kathy, Reim, Sean, Appleman, James, Evaluation of the Cunningham Panel™ in pediatric autoimmune neuropsychiatric disorder associated with streptococcal infection (PANDAS) and pediatric acute- onset neuropsychiatric syndrome (PANS); Changes in antineuronal antibody titers parallel changes in patient symptoms. *Journal of Neuroimmunology* 339 (2020)577138. January 2020
434. Shor, S., Green, C., Szantyr, B., Phillips, S., Liegner, K., Burrascano, J. J., Jr, Bransfield, R., & Maloney, E. L. (2019). Chronic Lyme Disease: An Evidence-Based Definition by the ILADS Working Group. *Antibiotics (Basel, Switzerland)*, 8(4), 269. <https://doi.org/10.3390/antibiotics8040269>
435. Shotland LI, Mastroianni MA, Choo DL, Szymko-Bennett YM, Dally LG, Pikus AT, Sledjeski K, Marques A. Audiologic manifestations of patients with post-treatment Lyme disease syndrome. *Ear Hear.* 2003 Dec;24(6):508-17
436. Shprecher D, Kurlan R. The Management of Tics. *Mov Disord.* Author manuscript; available in PMC 2009 Jun 24. Published in final edited form as: *Mov Disord.* 2009 Jan 15; 24(1): 15–24. doi: 10.1002/mds.22378
437. Skripchenko E.Yu., Ivanova G.P., Skripchenko N.V., Egorova E.S. Modern ideas about the pathogenesis of neuroborreliosis. *S.S. Korsakov Journal of Neurology and Psychiatry.* 2022;122(7):27-35.

438. Shulman KI. Disinhibition syndromes, secondary mania and bipolar disorder in old age. *Journal of Affective Disorders*. 1997; 46(3):175-182 [https://doi.org/10.1016/S0165-0327\(97\)00156-0](https://doi.org/10.1016/S0165-0327(97)00156-0).
439. Smith AJ, Oertle J, Prato D. *Borrelia burgdorferi*: Cell biology and clinical manifestations in latent chronic Lyme. *Open J Med Microbiol*. 2014;4:210-223.
440. Smith IS, Rechlin DP. Delayed diagnosis of neuroborreliosis presenting as bell palsy and meningitis. *J Am Osteopath Assoc*. 2010 Aug;110(8):441-4.
441. Smith V, Traquina DN. Pediatric bilateral facial paralysis. *Laryngoscope*. 1998 Apr;108(4 Pt 1):519-23.
442. Sno HN. Signs and significance of a tick-bite: psychiatric disorders associated with Lyme disease. *Tijdschr Psychiatr*. 2012;54(3):235-43.
443. Sparsa L, Blanc F, Lauer V, Cretin B, Marescaux C, Wolff V. Recurrent ischemic strokes revealing Lyme meningovascularitis. *Rev Neurol (Paris)*. 2009 Mar;165(3):273-7.
444. Staci D, BilboSD, Jaclyn M, Schwarz JM. Early-life programming of later-life brain and behavior: a critical role for the immune system. *Frontiers in Behavioral Neurosciences*. 2009;3
445. Staszewska K. Stan zdrowia psychicznego osób z rozpoznaniem neuroboreliozy [The state of mental health in people with a diagnosis of neuroborreliosis]. *Med Pr*. 2021 Mar 18;131698. Polish. doi: 10.13075/mp.5893.01049.
446. Steere AC. A 58-year-old man with a diagnosis of chronic Lyme disease, 1 year later. *JAMA*. 2002 Aug 28;288(8):1002- 10.
447. Stein SL, Solvason HB, Biggart E, Spiegel D. A 25-year-old woman with hallucinations, hypersexuality, nightmares, and a rash. *Am J Psychiatry*. 1996 Apr;153(4):545-51.
448. Stevens JR, Prince JB, Prager LM, Stern TA. Psychotic disorders in children and adolescents: a primer on contemporary evaluation and management. *Prim Care Companion CNS Disord*. 2014;16(2):PCC.13f01514. doi:10.4088/PCC.13f01514
449. Stevenson D, Hoang A, Schmoock N, Parsh B. Lyme neuroborreliosis: What nurses need to know. *Nursing*. 2021 Dec 1;51(12):60-62. doi: 10.1097/01.NURSE.0000800120.06684.f7. PMID: 34807867.
450. Stewart T. Common dementing illnesses associated with prominent and disturbing behavioral changes. *Geriatrics* . 2006, 61(8):23-27.
451. Stewart Z, Korsapathy S, Frohlich F. Crowd-sourced investigation of a potential relationship between Bartonella-associated cutaneous lesions and neuropsychiatric symptoms. *Front Psychiatry*. 2023. October 24, 14. <https://doi.org/10.3389/fpsy.2023.1244121>
452. Stratmoen M. Neurological complications of Lyme disease: Dilemmas in Diagnosis and Treatment. *Neurology Today* 2004;4(4)71-5.
453. Stricker RB, Winger EE. Holmes-Adie syndrome and Lyme disease. *Lancet*. 2001 Mar 10;357(9258):805.
454. Stricker RB, Johnson L (2014) Lyme Disease: Call for a “Manhattan Project” to Combat the Epidemic. *PLoS Pathog* 10(1): e1003796. <https://doi.org/10.1371/journal.ppat.1003796>
455. Stricker RB, Winger EE. Musical hallucinations in patients with Lyme disease. *South Med J* 2003; 96(7):711- 715 .
456. Stricker RB, Green CL, Savely VR, Chamallas SN, Johnson L. Safety of intravenous antibiotic therapy in patients referred for treatment of neurologic Lyme disease. *Minerva Med*. 2010 Feb;101(1):1-7.   
457. Stricker RB, DeLong AK, Green CL, Savely VR, Chamallas SN, Johnson L. Benefit of intravenous antibiotic therapy in patients referred for treatment of neurologic Lyme disease. *Int J Gen Med* 2011; 4: 639-646.
458. Stricker RB, Johnson L. Anti-neural antibody reactivity in patients with a history of Lyme borreliosis and persistent symptoms. *Brain Behavior Immun*. 2010;24: 1025 .
459. Sumiya H, Kobayashi K, Mizukoshi C, Aoki T, Koshino Y, Taki J, Tonami N. Brain perfusion SPECT in Lyme neuroborreliosis. *J Nucl Med*. 1997 Jul;38(7):1120-2.



460. Svetina C, Barr WB, Rastogi R, Hilton E. The neuropsychological examination of naming in Lyme borreliosis. *Appl Neuropsychol*. 1999;6(1):33-8.
461. Tager FA, Fallon BA, Keilp J, Rissenberg M, Jones CR, Liebowitz MR. A controlled study of cognitive deficits in children with chronic Lyme disease. *J Neuropsychiatr Clin Neurosci* 2001;13:500-507.
462. Tager FA, Fallon BA. Psychiatric and cognitive features of Lyme disease. *Psychiatr Ann* 2001; 31: 173-181.
463. Tetens MM, Haahr R, Dessau RB, et al. Assessment of the Risk of Psychiatric Disorders, Use of Psychiatric Hospitals, and Receipt of Psychiatric Medication Among Patients With Lyme Neuroborreliosis in Denmark. *JAMA Psychiatry*. 2021;78(2):177–186. doi:10.1001/jamapsychiatry.2020.2915
464. Touradji P, Aucott JN, Yang T, Rebman AW, Bechtold KT. Cognitive Decline in Post- treatment Lyme Disease Syndrome. *Arch Clin Neuropsychol* [2019]
465. Treib J, Grauer MT, Haass A, Langenbach J, Holzer G, Woessner R. Chronic fatigue syndrome in patients with Lyme borreliosis. *Eur Neurol*. 2000;43(2):107- 9.
466. Tselis A, MD, Booss J. Behavioral consequences of infections of the central nervous system: with emphasis on viral infections. *J Am Acad Psychiatry Law* 2003;31:289– 98.
467. Tucci V, Moukaddam N, Meadows J et al. The Forgotten Plague: Psychiatric Manifestations of Ebola, Zika, and Emerging Infectious Diseases. *J Glob Infect Dis*. 2017 Oct-Dec; 9(4): 151–156. doi: 10.4103/jgid.jgid\_66\_17
468. U.S. Department of Health and Human Services, Office of the Assistant Secretary for Health. Tick-Borne Disease Working Group 2022 Report to Congress: 3<sup>rd</sup> Report to Congress. <https://www.hhs.gov/sites/default/files/tbdwg-2022-report-to-congress.pdf>
469. Vámos E, Pardutz A, Klivenyi P, Toldi J, Vecsei L The role of kynurenines in disorders of the central nervous system: Possibilities for neuroprotection. *J Neurol Sci*. 2009 Mar 4.
470. van den Bergen HA, Smith JP, van der Zwan A. Lyme Psychosis. *Ned Tijdschr Geneesk* 1993 Oct 9;137(41):2098-100.
471. Vázquez M, Sparrow SS, and Shapiro ED. Long-term neuropsychologic and health outcomes of children with facial nerve palsy attributable to Lyme disease. *Pediatrics* 2003; 112(2): e93-e97.
472. Venkatesan A, Williams MA. Case 13: A Man with Progressive Headache and Confusion. *MedGenMed*. 2006; 8(3): 19. Published online 2006 Jul 26.
473. Vital C, Vital A, Lagueny A, Larribau E, Saintarailles J, Julien J. Subacute inflammatory polyneuropathy: two cases with plasmacytoid histiocytes in the endoneurium. *Ultrastruct Pathol*. 1998 Sep-Oct;22(5):377-83.
474. Volkman D Anti-neural antibody reactivity in patients with a history of Lyme borreliosis and persistent symptoms. *Brain Behavior Immun*. 2010;24:1026.
475. Waniek C, Prohovnik I, Kaufman MA, Dwork AJ. Rapidly progressive frontal- type dementia associated with Lyme disease. *J Neuropsychiatry Clin Neurosci* 1995;7(3):345-7.
476. Warneke L. Managing resistant depression. When patients do not respond to therapy. *Can Fam Physician*. 1993;39:843–850.
477. Weder B, Wiedersheim P, Matter L, Steck A, Otto F. Chronic progressive neurological involvement in *Borrelia burgdorferi* infection. *J Neurology* 1987;234:40- 43.
478. Weinstein ER, Rebman AW, Aucott JN, Johnson-Greene D, Bechtold KT. Sleep quality in well-defined Lyme disease: a clinical cohort study in Maryland. *Sleep*. 2018 May 1;41(5). doi: 10.1093/sleep/zsy035. PMID: 29452400.
479. Weissenbacher S, Ring J, Hofmann H. Gabapentin for the symptomatic treatment of chronic neuropathic pain in patients with late-stage Lyme borreliosis: a pilot study. *Dermatology*. 2005;211(2):123-7.
480. Westervel HJ, McCaffrey RJ. Neuropsychological functioning in chronic Lyme disease.

Neuropsychol Rev 2002 Sep;12(3):153-77 Review.

481. Wilke M, Eiffert H, Christen HJ, Hanefeld F. Primarily chronic and cerebrovascular course of Lyme neuroborreliosis: case reports and literature review. *Arch Dis Child*. 2000 Jul;83(1):67-71. Review.
482. Wills AB, Spaulding AB, Adjemian J, et al. Long-term Follow-up of Patients with Lyme Disease: Longitudinal Analysis of Clinical and Quality-of-life Measures, *Clinical Infectious Diseases*. PlumX Metrics. 2016, 62(12): 1546–1551. DOI: [https://doi.org/10.1016/0738-081X\(93\)90095-T](https://doi.org/10.1016/0738-081X(93)90095-T)
483. Woessner R, Treib J. Pain, fatigue, depression after borreliosis. Antibiotics used up-- what next? *MMW Fortschr Med*. 2003 Sep 18;145(38):45-8.
484. Wokke JHJ, van Gijn J, Elderson A, Stanek G. Chronic forms of *Borrelia burgdorferi* infection of the nervous system. *Neurology* 1987;37:1031-1034.
485. Wurtz R, Psychiatric Diseases Presenting as Infectious Diseases, *Clinical Infectious Diseases*. 1998, 26(4): 924–932, <https://doi.org/10.1086/513936>
486. Mendez, M.F. Mania in Neurologic Disorders. *Curr Psychiatry Rep* (2000) 2: 440. <https://doi.org/10.1007/s11920-000-0030-6>
487. Yolken RH, Torrey EF. Aresome cases of psychosis caused by microbial agents? A review of the evidence. *Mol Psychiatry*. 2008 May;13(5):470-9.
488. Younger DS, Rosoklija G, Hays AP. Persistent painful Lyme radiculoneuritis. *Muscle Nerve*. 1995 Mar;18(3):359-60.
489. Younger DS. Serial Brain Positron Emission Tomography Fused to Magnetic Resonance Imaging in Post-Infectious and Autoantibody-Associated Autoimmune Encephalitis. *World Journal of Neuroscience*. 2019, 9, 153-156. DOI: 10.4236/wjns.2019.93010 <http://www.scirp.org/Journal/paperinformation.aspx?paperid=94154>
490. Young JL. Chronic Lyme disease linked to ADHD in adults. American Psychiatric Association 2012 Annual Meeting. Medscape. May 2 2012. <http://www.medscape.com/viewarticle/763458>
491. Zagorac, G. B., & Kezele, T. G. (2021). Ceftriaxone and Doxycycline induced Seroconversion in Previously Seronegative Patient with Clinically Suspected Disseminated Lyme Disease: Case Report. *Infection & chemotherapy*, 53(3), 582–588. <https://doi.org/10.3947/ic.2021.0008>
492. Zajkowska JM, Hermanowska-Szpakowicz T, Kondrusik M, Pancewicz SA. Neurologic syndromes in Lyme disease. *Pol Merkuriusz Lek*. 2000 Aug;9(50):584-8. Review.
493. Zajkowska JM, Hermanowska-Szpakowicz T, Grygorczuk S, Kondrusik M, Pancewicz SA, Czczuga A et al. Neuroborreliosis. *Polski Przegląd Neurologiczny* 2006; 2(1): 13–21
494. Zajkowska J, Garkowski A, Moniuszko A, Czupryna P, Ptaszyńska-Sarosiek I, Tarasów E, Ustymowicz A, Łebkowski W, Pancewicz S. Vasculitis and stroke due to Lyme neuroborreliosis - a review. *Infect Dis (Lond)*. 2015 Jan;47(1):1-6. doi: 10.3109/00365548.2014.961544. Epub 2014 Oct 24. Erratum in: *Infect Dis (Lond)*. 2015;47(10):754.
495. Zajkowska JM, Poplawska R, Pancewicz SA, Kondrusik M, Gudel I, Snarska I. Mental disorders in the course of neuroborreliosis: own observation. *Psychiatr Pol* 1999 Nov-Dec;33(6):939-46.
496. Zamponi N, Cardinali C, Tavoni MA, Porfiri L, Rossi R, Manca A. Chronic neuroborreliosis in infancy. *Ital J Neurol Sci*. 1999; 20:303-307.
497. Zeeb M, Kerrinnes T, Cicin-Sain L, Guzman CA, Puppe W, Schulz TF, Peters A, Berger K, Castell S, Karch A. Seropositivity for pathogens associated with chronic infections is a risk factor for all-cause mortality in the elderly: findings from the Memory and Morbidity in Augsburg Elderly (MEMO) Study. *Geroscience*. 2020 Oct;42(5):1365-1376. doi: 10.1007/s11357-020-00216-x. Epub 2020 Jul 9. PMID: 32648237; PMCID: PMC7525922.
498. Zhang Y, Lafontant G, Bonner FJ Jr. Lyme neuroborreliosis mimics stroke: a case report. *Arch Phys Med Rehabil*. 2000 Apr;81(4):519-21.
499. Zick, J.L., Wichser, L. Idiopathic catatonic syndrome in a young male with no

prior psychiatric history: a case report. *J Med Case Reports* **17**, 199 (2023).  
<https://doi.org/10.1186/s13256-023-03903-3>

500. Zifko U, Schmidt B, Grisold W, Stanek G. Neurolues. Ein Fallbericht und Literaturübersicht über die Differential diagnose Neuroborreliose [Neurosypphilis. A case report and review of the literature on differential neuroborreliosis diagnosis]. *Wien Med Wochenschr.* 1995;145(7-8):191-4. German.
501. Zubcevik, N., Mao, C., Wang, Q. M., Bose, E. L., Octavien, R. N., Crandell, D., & Wood, L. J. (2020). Symptom Clusters and Functional Impairment in Individuals Treated for Lyme Borreliosis. *Frontiers in medicine*, 7, 464. <https://doi.org/10.3389/fmed.2020.00464>

## Tick-Borne Diseases and Dementia

1. Aboul-Enein F, Kristoferitsch W. Normal pressure hydrocephalus or neuroborreliosis? *Wien Med Wochenschr.* 2009;159(1-2):58-61.
2. Almeida OP, Nicola T. Lautenschlager. Dementia associated with infectious diseases. *International Psychogeriatrics.* 2005; 17(Suppl): S65–S77.
3. *Annals of the New York Academy of Sciences, Lyme Disease and Related Disorders.* 539, 468–470.
4. Bannwarth, A. Zur Klinik und Pathogenese der chronischen lymphocytären Meningitis. *Arch Psychiatr Nervenkr.* 1944;117: 161- 185.
5. Blanc F, Philippi N, Cretin B, Kleitz C, Berly L, Jung B, Kremer S, Namer IJ, Sellal F, Jaulhac B, de Seze J. Lyme neuroborreliosis and dementia. *J Alzheimers Dis.* 2014; 41(4): 1087-93.
6. Chakravarthi ST, Joshi SG. An Association of Pathogens and Biofilms with Alzheimer's Disease. *Microorganisms.* 2021 Dec 28;10(1):56. doi: 10.3390/microorganisms10010056. PMID: 35056505; PMCID: PMC8778325.
7. Di Battista ME, Dell'Acqua C, Baroni L, Fenoglio C, Galimberti D, Gallucci M. Frontotemporal Dementia Misdiagnosed for Post-Treatment Lyme Disease Syndrome or vice versa? A Treviso Dementia (TREDEM) Registry Case Report. *J Alzheimers Dis.* 2018;66(2):445-451. doi: 10.3233/JAD-180524.
8. Duyckaerts C, Delatour B, Potier MC. Classification and basic pathology of Alzheimer disease. *Acta Neuropathol* 2009;118, 5-36
9. Gadila SKG, Rosoklija G, Dwork AJ, Fallon BA, Embers ME. Detecting Borrelia Spirochetes: A Case Study with Validation Among Autopsy Specimens. *Front Neurol.* 2021 May 10;12:628045. doi: 10.3389/fneur.2021.628045. PMID: 34040573; PMCID: PMC8141553.
10. Galbussera A, Tremolizzo L, Isella V, et al. Lack of evidence for Borrelia burgdorferi seropositivity in Alzheimer disease. *Alzheimer Dis Assoc Disord* 2008;22(3), 308.
11. Ganz, T., Fainstein, N. & Ben-Hur, T. When the infectious environment meets the AD brain. *Mol Neurodegeneration* **17**, 53 (2022). <https://doi.org/10.1186/s13024-022-00559-3>
12. Garrett M. "Multiple Causes of Dementia as Engineered Senescence." *European Journal of Medical and Health Science, EJMED.* 2020, 2(2). DOI: <http://dx.doi.org/10.24018/ejmed.2020.2.2.227>
13. Guo JP, Arai T, Miklossy J, McGeer PL. A $\beta$  and tau form soluble complexes that may promote self-aggregation of both into the insoluble forms observed in Alzheimer's disease. *Proc Natl Acad Sci U S A.* 2006 Feb 7;103(6):1953-8.
14. Haass C, Selkoe DJ. Soluble protein oligomers in neurodegeneration: lessons from the Alzheimer's amyloid beta-peptide. *Nat Rev Mol Cell Biol* 2007;8: 101-12.
15. Hardy J, Selkoe DJ. The amyloid hypothesis of Alzheimer's disease: progress and problems on the road to therapeutics. *Science* 2002;297: 353-6
16. Holmes C, Cotterell D. Role of infection in the pathogenesis of Alzheimer's disease: implications for

treatment. *CNS Drugs* 2009;23(12): 993-1002.

17. Honjo K, van Reekum R, Verhoeff NP. Alzheimer's disease and infection: Do infectious agents contribute to progression of Alzheimer's disease? *Alzheimers Dement*. 2009;5: 348-360 .
18. Itzhaki RF, Lathe R, Balin BJ, Ball MJ, Bearer EL, Braak H, Bullido MJ, Carter C, Clerici M, Cosby SL, Del Tredici K, Field H, Fulop T, Grassi C, Griffin WS, Haas J, Hudson AP, Kamer AR, Kell DB, Licastro F, Letenneur L, Lövheim H, Mancuso R, Miklossy J, Otth C, Palamara AT, Perry G, Preston C, Pretorius E, Strandberg T, Tabet N, Taylor-Robinson SD, Whittum-Hudson JA. Microbes and Alzheimer's Disease. *J Alzheimers Dis*. 2016;51(4):979-84.
19. Jack CR Jr, Knopman DS, Jagust WJ, Shaw LM, Aisen PS, Weiner MW, Petersen RC, Trojanowski JQ. Hypothetical model of dynamic biomarkers of the Alzheimer's pathological cascade. *Lancet Neurol* 2010;9:119-28.
20. Khan UA, Liu L, Provenzano FA, Berman DE, Profaci CP, Sloan R, Mayeux R, Duff KE, Small SA. Molecular drivers and cortical spread of lateral entorhinal cortex dysfunction in preclinical Alzheimer's disease. *Nat Neurosci*. 2014 Feb;17(2):304-11.
21. Kristoferitsch W, Aboulenein-Djamshidian F, Jecel J, Rauschka H, Rainer M, Stanek G, Fischer P. Secondary dementia due to Lyme neuroborreliosis. *Wien Klin Wochenschr*. 2018 Aug;130(15-16):468-478. doi: 10.1007/s00508-018-1361-9. Epub 2018 Jul 25. PMID: 30046879; PMCID: PMC6096534.
22. Lue LF, Kuo YM, Roher AE, Brachova L, Shen Y, Sue L, Beach T, Kurth JH, Rydel RE, Rogers J. Soluble amyloid beta peptide concentration as a predictor of synaptic change in Alzheimer's disease. *Am J Pathol* 1999;155: 853-862.
23. MacDonald AB. Alzheimer Plaques visualized by in situ DNA Hybridization with Molecular Beacons specific for *Borrelia* – a novel histomorphologic application. *Med Clin Res*, 2021;6(2): 330-3. <https://www.ilads.org/wp-content/uploads/2021/05/Medical-and-Clinical-Research-PDF-final-Christensen.pdf>
24. MacDonald AB. *Borrelia* Invasion of Brain Pyramidal Neurons and Biofilm *Borrelia* Plaques in Neuroborreliosis Dementia with Alzheimer's Phenotype. *Microbiol Infect Dis*. 2021; 5(1): 1-11. <https://www.ilads.org/wp-content/uploads/2021/02/MacDonald-A-Borreliosis-Alzheimer-IJMI-21-253-Corrected-Proof-Feb-12-2021.pdf>
25. MacDonald AB. Brain herniation death in pediatric cerebral lyme borreliosis followed by kidney organ donation *J Clin Med Img Case Rep*. 2022; 2(1): 1059. *Brain-Herniation- Death-in-Pediatric-Cerebral-Lyme-Borreliosis-Followed-by-Kidney-Organ-Donation.pdf* (ilads.org)
26. MacDonald AB. Concurrent neocortical Borreliosis and Alzheimer's disease: Demonstration of a spirochetal cyst form. *Ann NY Acad Sci* 1988;539:468-470.
27. MacDonald AB, Miranda JM. Concurrent neocortical borreliosis and Alzheimer's disease. *Human Pathol* 1987; 18: 759-761.
28. MacDonald AB. Concurrent neocortical borreliosis and Alzheimer's disease: demonstration of a spirochetal cyst form. *Ann NY Acad Sci* 1988; 539: 468-470.
29. MacDonald AB, Berger BW, and Schwan TG. Clinical implications of delayed growth of the Lyme disease spirochete, *Borrelia burgdorferi*. *Acta Trop* 1990 48; (2): 89-94.
30. MacDonald AB. In situ DNA hybridization study of granulovacuolar degeneration in human Alzheimer autopsy neurons for flagellin b transcriptomes of *Borrelia burgdorferi*. *Alzheimer's Dis Dementia* 2006; 2 (Suppl. 1): S207.
31. MacDonald AB. Cystic borrelia in Alzheimer's disease and in non-dementia neuroborreliosis. *Alzheimer's Dementia* 2006; 2 (Suppl. 1):S433.
32. MacDonald AB. Microbial DNA globular liquid crystal-like deposits inside Lewy bodies in four Lewy dementia patients. *Med Clin Res*. 2022;7(8):05.
33. MacDonald AB. Plaques of Alzheimer's disease originate from cysts of *Borrelia burgdorferi*, the Lyme disease spirochete. *Med Hypotheses*. 2006;67(3):592-600.

34. MacDonald AB. Spirochetal cyst forms in neurodegenerative disorders...hiding in plain sight. *Med Hypotheses*. 2006;67(4):819-32. Epub 2006 Jul 7.
35. MacDonald AB. Transfection "Junk" DNA - a link to the pathogenesis of Alzheimer's disease? *Med Hypotheses*. 2006;66(6):1140-1.
36. MacDonald AB. Alzheimer's neuroborreliosis with trans-synaptic spread of infection and neurofibrillary tangles derived from intraneuronal spirochetes. *Med Hypotheses* 2007; 68: 822-825. [7 of 10 cases of Alzheimer's disease had B. burgdorferi in their brains].
37. MacDonald AB. Alzheimer's disease Braak Stage progressions reexamined and redefined as Borrelia infection transmission through neural circuits. *Med Hypotheses*. 2007; 68(5): 1059-64
38. MacDonald AB, Miranda JM. Concurrent neocortical borreliosis and Alzheimer's disease. *Hum Pathol*. 1987 Jul;18(7):759-61.
39. MacDonald AB. Plaques of Alzheimer's disease originate from cysts of Borrelia burgdorferi, the Lyme disease spirochete. *Med Hypotheses*. 2006;67(3):592-600.
40. Macdonald AB. Transfection "junk" DNA – A link to the pathogenesis of Alzheimer's disease? *Medical Hypothesis*. 2006;66(6):1140-1.
41. MacDonald AB. Borrelia in the brains of patients dying with dementia. *JAMA*. 1986;256:2195-2196.
42. MacDonald AB. Alzheimer's neuroborreliosis with trans-synaptic spread of infection and neurofibrillary tangles derived from intraneuronal spirochetes. *Med Hypotheses*. 2007;68(4):822-5. Epub 2006 Oct 20.
43. MacDonald AB. Concurrent neocortical borreliosis and Alzheimer's disease: Demonstration of a spirochetal cyst form. *Ann N Y Acad Sci* 1988; 539:468-470.
44. Mawanda F, Wallace R. Can infections cause Alzheimer's disease? *Epidemiol Rev*. 2013;35(1):161-80. doi: 10.1093/epirev/mxs007.
45. McLaughlin R, Kin NM, Chen MF, et al. Alzheimer's disease may not be a spirochetosis. *Neuroreport* 1999;10(7), 1489-91.
46. Meer-Scherrer L, Chang Loa C, Adelson ME, Mordechai E, Lobrinus JA, Fallon BA, Tilton RC. Lyme disease associated with Alzheimer's disease. *Curr Microbiol*. 2006 Apr;52(4):330-2.
47. Miklossy J. Alzheimer's disease — a spirochetosis? *NeuroReport* 1993; 4: 841-848.
48. Miklossy J, Gern L, Darekar P, Janzer RC, Loos H. Senile plaques, neurofibrillary tangles and neuropil threads contain DNA? *J Spiro Tick-borne Dis* 1995; 2: 1-5.
49. Miklossy JM, Khalili K, Gern L, Ericson RL, Darekar P, Bolle L, Hurlimann J, and Paster BJ. Borrelia burgdorferi persists in the brain in chronic Lyme neuroborreliosis and may be associated with Alzheimer's disease. *J Alzheimers Dis* 2004; 6: 639-649.
50. Miklossy J. Chronic inflammation and amyloidogenesis in Alzheimer's disease — role of spirochetes. *J Alzheimers Dis* 2008; 13: 381-391.
51. Miklossy J, Kasas S, Zurn AD, McCall S, Yu S, and McGeer PL. Persisting atypical and cystic forms of Borrelia burgdorferi and local inflammation in Lyme neuroborreliosis. *J Neuroinflammation* 2008; 5: 40-57.
52. Miklossy J. Chronic or late Lyme neuroborreliosis: analysis of evidence compared to chronic or late neurosyphilis. *Open Neurol J* 2012;6: 146-157.
53. Miklossy J. Chronic inflammation and amyloidogenesis in Alzheimer's disease -- role of spirochetes. *Alzheimers Dis*. 2008 May;13(4):381-91. Review.
54. Miklossy J. Alzheimer's disease - a neurospirochetosis. Analysis of the evidence following Koch's and Hill's criteria. *J Neuroinflammation*. 2011 Aug 4;8(1):90.
55. Miklossy J. Historic evidence to support a causal relationship between spirochetal infections and Alzheimer's disease. *Frontiers Aging Neurosci*. 2015 Apr 16;7:46.
56. Miklossy J. Bacterial amyloid and DNA are important constituents of senile plaques: Further evidence of the spirochetal and biofilm nature of senile plaques. *J Alzheimer's Dis*. 2016;53:1459-1473.
57. Miklossy J. Emerging roles of pathogens in Alzheimer disease. *Expert Rev Mol Med*. 2011 Sep 20;13:e30.
58. Miklossy J, Donta SE, Mueller K, Nolte O, Perry G. Chronic or late Lyme neuroborreliosis:

present and future. *Open Neurol J.* 2012;6:78.

59. Miklossy J, Kasas S, Janzer RC, Ardizzoni F, Van der Loos H. Further ultrastructural evidence that spirochaetes may play a role in the aetiology of Alzheimer's disease. *Neuroreport.* 1994 Jun 2;5(10):1201-4.
60. Miklossy J, Kasas S, Zurn AD, McCall S, Yu S, McGeer PL. Persisting atypical and cystic forms of *Borrelia burgdorferi* and local inflammation in Lyme neuroborreliosis. *J. Neuroinflammation.* 2008;5: 40.
61. Miklossy J, Khalili K, Gern L, Ericson RL, Darekar P, Bolle L, Hurlimann J, Paster BJ. *Borrelia burgdorferi* persists in the brain in chronic Lyme neuroborreliosis and may be associated with Alzheimer disease. *J Alzheimer's Disease* 2004;6 (6): 639-49; discussion 673-681.
62. Miklossy J, Kris A, Radenovic A, Miller L, Forro L, Martins R, Reiss K, Darbinian N, Darekar P, Mihaly L, Khalili K. Beta-amyloid deposition and Alzheimer's type changes induced by *Borrelia* spirochetes. *Neurobiol Aging.* 2006Feb;27(2):228-36.
63. Miklossy J, Kuntzer T, Bogousslavsky J, Regli F, Janzer RC. Meningovascular form of neuroborreliosis: Similarities between neuropathological findings in a case of Lyme disease and those occurring in tertiary neurosyphilis. *Acta Neuropathol* 1990;80. 568- 572.
64. Miklossy J, Taddei K, Martins R et al. Alzheimer disease: curly fibers and tangles in organs other than brain. *J Neuropathol Exp Neurol.* 1999;58, 803-814.
65. Miklossy J, Van der Loos H. (1991) The long-distance effects of brain lesions: A study of myelinated pathways in the human brain using polarizing and fluorescence microscopy. *J Neuropathol Exp Neurol* 50, 1-15.
66. Miklossy J. (2012) Chronic or late lyme neuroborreliosis: analysis of evidence compared to chronic or late neurosyphilis. *Open Neurol J.* 6, 146-57.
67. Miklossy J. Alzheimer's disease - a neurospirochetosis. Analysis of the evidence following Koch's and Hill's criteria. *J Neuroinflammation.* 2011 Aug 4;8(1):90.
68. Miklossy J. Biology and neuropathology of dementia in syphilis and Lyme disease. *Handb Clin Neurol.* 2008;89:825-44.
69. Miklossy J. Chronic inflammation and amyloidogenesis in Alzheimer's disease -- role of spirochetes. *J Alzheimers Dis.* 2008 May;13(4):381-91.
70. Miklossy J. Historic evidence to support a causal relationship between spirochetal infections and Alzheimer's disease. *Frontiers in Aging Neuroscience.* 2015 Apr 16;7:46.
71. Miklossy J. Alzheimer's disease--a spirochetosis? *Neuroreport.* 1993 Jul;4(7):841-8.
72. Miklossy J. The lack of correlation between the incidence of Lyme disease and deaths due to Alzheimer's disease cannot reflect the lack of involvement of *Borrelia burgdorferi* in Alzheimer's dementia. *J Alzheimers Dis* 2014;42:115-118.
73. Nilsson P et al. A $\beta$  secretion and plaque formation depend on autophagy. *Cell Reports* 2013;5(1): 61-69.
74. Neugroschl J, Wang S. Alzheimer's Disease: Diagnosis and Treatment Across the Spectrum of Disease Severity. *Mt Sinai J Med.* Author manuscript; available in PMC 2012 Mar 29. Published in final edited form as: *Mt Sinai J Med.* 2011 Jul-Aug; 78(4): 596-612. doi: 10.1002/msj.20279
75. Pappolla MA, Omar R, Saran B, et al. Concurrent neuroborreliosis and Alzheimer's disease: analysis of the evidence. *Hum Pathol* 1989;20(8): 753-7.
76. Pearson S. Recognising and understanding Lyme disease. *Nursing Standard.* 2014 Sep 3;29(1).
77. Riek R. Infectious Alzheimer's disease? *Nature* 2006;444: 429-431 .
78. Ruitenberg A, den Heijer T, Bakker SL, van Swieten JC, Koudstaal PJ, Hofman A, Breteler MM. Cerebral hypoperfusion and clinical onset of dementia: the Rotterdam study. *Ann Neurol.* 2005;57: 789-94.
79. Sanchini C, Papia C, Cutaia C, Poloni TE, Cesari M. A case of reversible dementia?  
Dementia vs delirium in Lyme disease. *Ann Geriatr Med Res.* 2023 Feb 6. doi: 10.4235/agmr.22.0128.
80. Selkoe DJ. Preventing Alzheimer's disease. *Science* 2012;337: 1488-92.

81. Senejani AG, Maghsoudlou J, El-Zohiry D, Gaur G, Wawrzeniak K, Caravaglia C, Khatri VA, MacDonald A, Sapi E. *Borrelia burgdorferi* Co-Localizing with Amyloid Markers in Alzheimer's Disease Brain Tissues. *J Alzheimers Dis.* 2022;85(2):889-903. doi: 10.3233/JAD-215398.
82. Suter O-C, Sunthorn T, Kraftsik R, Straubel J, Darekar P, Khalili K, Miklossy J. Cerebral Hypoperfusion generates cortical watershed microinfarcts in Alzheimer disease. *Stroke* 2002;33: 1986-1992 .
83. Verdile G, Gnjec A, Miklossy J, Fonte J, Veurink G, Bates K, Kakulas B, Mehta PD, Milward EA, Tan N, Lareu R, Lim D, Dharmarajan A, Martins RN. Protein markers for Alzheimer disease in the frontal cortex and cerebellum. *Neurology.* 2004 Oct 26;63(8):1385-92.
84. Vojtechova I, Machacek T, Kristofikova Z, Stuchlik A, Petrsek T. Infectious origin of Alzheimer's disease: Amyloid beta as a component of brain antimicrobial immunity. *PLoS Pathog.* 2022 Nov 17;18(11):e1010929. doi: 10.1371/journal.ppat.1010929.
85. Wanek C, Prohovnik I, Kaufman MA, Dwork AJ. Rapidly progressive frontal-type dementia associated with Lyme disease. *J Neuropsych Clin Neurosci.* 1995;7(3):345-7.
86. Williams WM, Torres S, Siedlak SL, Castellani RJ, Perry G, Smith MA, Zhu X. Antimicrobial peptide beta-defensin-1 expression is upregulated in Alzheimer's brain. *J Neuroinflammation.* 2013;10(1): 127.
87. Zajkowska JM, Hermanowska-Szapkowicz T. New aspects of the pathogenesis of Lyme disease. *Przegl Epidemiol* 2002;56 (Suppl 1):57-67.
88. Zlokovic BV. Neurovascular pathways to neurodegeneration in Alzheimer's disease and other disorders. *Nat Rev Neurosci* 2011;12, 723-38.

## Supplementary S2

### Lyme Disease Screening Assessment

Based upon: Bransfield RC, Aidlen DM, Cook MJ, Javia S. A Clinical Diagnostic System for Late-Stage Neuropsychiatric Lyme Borreliosis Based upon an Analysis of 100 Patients. *Healthcare*. 2020; 8(1):13.

<https://doi.org/10.3390/healthcare8010013>

\_\_\_\_\_ Do you live, vacation, or engage in occupational or other activities in areas that may expose you to ticks?

\_\_\_\_\_ Have family members, neighbors, or the family dog been infected?

\_\_\_\_\_ Is there a history of a tick bite, possibly with a flu-like illness and/or a bull's-eye or other rash?

\_\_\_\_\_ Is there a point at which your health declined, followed by a fluctuating progression and development of multi-systemic symptoms, including cognitive, psychiatric, neurological, and somatic symptoms adversely impacting school, social life, family life?

\_\_\_\_\_ Have you ever been treated for Lyme disease, suspected you had Lyme disease but was told it was ruled out?

\_\_\_\_\_ Have antibiotics ever caused a sudden worsening followed by an improvement of symptoms?"



## Supplementary S3

### Coinfection Screen: Sorting out Lyme and Associated Coinfections<sup>1</sup> (Check if yes)

#### *Classic Lyme (Bb infection)*

Gradual onset of initial (viral-like) symptoms—this often makes it difficult to pinpoint when the infection began. Also, as in the case with Bb infection, laboratory tests for them are often insensitive. Thus, there is a need to sort it all out clinically to provide guidance in testing and treatment. Here are some clues:

1. \_\_\_\_ Multisystem—almost always, in disseminated stages, involves more than one part or system (i.e., joint pain plus cognitive dysfunction).
2. \_\_\_\_ Migratory—first a knee will hurt, then over time this may lessen, and the elbow or shoulder acts up, and later the joints calm down, but headaches worsen.
3. \_\_\_\_ Stiff joints and loud joint crepitus, especially the neck (“Lyme shrug”).
4. \_\_\_\_ Headaches are often nuchal and associated with stiff, painful, and crepitant neck.
5. \_\_\_\_ Afternoon fevers, often unnoticed—most Lyme patients have subnormal temperatures in the morning but rise to 99+ by early to mid-afternoon. No obvious sweats.
6. \_\_\_\_ Tiredness and limited stamina—often is a strong need to rest or even nap in the afternoon, especially when the flushed face and elevated temperature appears.
7. \_\_\_\_ Four-week cycles—Bb activity, and thus symptoms, wax and wane in a cycle that repeats roughly every four weeks. This cycle, if clear, can guide your treatments.
8. \_\_\_\_ Slow response to treatment, with an initial symptom flare in most (“Herxheimer-like reaction”), then improvement over weeks, punctuated by the monthly symptom flares. Likewise, if treatment is ended too soon, an initial period of well-being will gradually be replaced by a return of symptoms over a few weeks.
9. \_\_\_\_ EM rash in 25% to 50% of patients.

#### *Bartonella and “Bartonella-Like Organisms”*

1. \_\_\_\_ Gradual onset of initial illness.
2. \_\_\_\_ Central nervous system symptoms are out of proportion to the musculoskeletal ones and can include muscle twitches, tremors, insomnia, seizures, agitation, anxiety, severe mood swings, outbursts, and antisocial behavior.
3. \_\_\_\_ Gastrointestinal involvement may present as gastritis or abdominal pain (mesenteric adenitis).
4. \_\_\_\_ Sore soles, especially in the morning.
5. \_\_\_\_ Tender subcutaneous nodules along the extremities, especially outer thigh, shins, and occasionally along the triceps.
6. \_\_\_\_ Occasional lymphadenopathy.
7. \_\_\_\_ Morning fevers, usually around 99; occasionally light sweats are noted.
8. \_\_\_\_ Elevated vascular endothelial growth factor (VEGF) occurs in a minority, but the degree of elevation correlates with activity of the infection and may be used to monitor treatment.
9. \_\_\_\_ Rapid response to treatment changes—often symptoms improve within days after antibiotics are begun, but relapses occur also within days if medication is withdrawn early.
10. \_\_\_\_ May have papular or linear red rashes (like stretch marks that do not always follow skin planes), especially in those with GI involvement.

#### *Babesia Species*

1. \_\_\_\_ Rapid onset of initial illness, often with sudden onset of high fever, severe headaches, sweats, and fatigue; thus, it is easy to know when infection began.
2. \_\_\_\_ Obvious sweats, usually at night, but can be day sweats as well.

3. \_\_\_\_ Air hunger, the need to sigh and take a deep breath; dry cough without apparent reason.
4. \_\_\_\_ Headaches can be severe–dull, global (involves the whole head, described like the head is in a vise).
5. \_\_\_\_ Fatigue is prominent, does not clear with rest, and is made worse with exercise.
6. \_\_\_\_ Mental dullness and slowing of reactions and responses.
7. \_\_\_\_ Dizziness–more like a tippy feeling, and not vertigo or purely orthostasis.
8. \_\_\_\_ Symptoms cycle rapidly, with flares every four to six days.
9. \_\_\_\_ Hypercoagulation is often associated with Babesia infections.
10. \_\_\_\_ Rarely, splenomegaly.
11. \_\_\_\_ Very severe Lyme disease can be a clue to Babesia infection, as it will make Lyme symptoms worse and Lyme treatments less effective.

#### ***Ehrlichia/Anaplasma***

1. \_\_\_\_ Rapid onset of initial illness with fever, headache, prostration.
2. \_\_\_\_ Headaches are sharp, knife-like, and often behind the eyes.
3. \_\_\_\_ Muscle pain, not joint pain, and can be mild or severe.
4. \_\_\_\_ Low WBC, low platelet count, elevated liver enzymes, and (rarely) inclusions seen in the WBCs.
5. \_\_\_\_ Rarely see diffuse vasculitic rash, including palms and soles (less than 10%).
6. \_\_\_\_ Rapid response to treatment.

#### ***DNA Viruses (HHV-6, EBV, CMV)***

1. \_\_\_\_ Persistent fatigue made worse with exercise.
2. \_\_\_\_ Sore throat, lymphadenopathy, and other viral-like complaints.
3. \_\_\_\_ May see elevated liver enzymes and low WBCs.

#### ***Mycoplasma***

1. \_\_\_\_ Gradual onset.
2. \_\_\_\_ May be light night sweats.
3. \_\_\_\_ Symptoms are made worse with exercise.
4. \_\_\_\_ Major fatigue and neurological dysfunction, especially autonomic neuropathies.
5. \_\_\_\_ Metabolic disturbances, immune damage, very low CD57 count (less than 20).
6. \_\_\_\_ Found in the sickest and most poorly responding Lyme patients (CFIDS-like).

---

<sup>1</sup> Burrascano JJ. The Burrascano Checklist of Current Symptoms. Available online: <http://www.lymenet.org/BurrGuide200810.pdf> (accessed on 9 November 2019).
